# Supplementary material for: The Effectiveness of eHealth Interventions for Weight Loss and Weight Loss Maintenance in Adults with Overweight or Obesity: A Systematic Review of Systematic Reviews
Source: PubMed Central journal article supplement (PMC10482795; doi:10.1007/s13679-023-00515-2), 2023-06-24
Supplement: 13679_2023_515_MOESM1_ESM.pdf [file 13679_2023_515_MOESM1_ESM.pdf]

# The effectiveness of eHealth interventions for weight loss and weight loss maintenance in adults with overweight or obesity: a systematic review of systematic reviews

Kupila SK<sup>1</sup>, Joki A<sup>2</sup>, Suojanen LU<sup>2</sup>, Pietiläinen KH<sup>1,2</sup>

<sup>1</sup> Obesity Research Unit, Research Program for Clinical and Molecular Metabolism, Faculty of Medicine, University of Helsinki, Helsinki, Finland

<sup>2</sup> HealthyWeightHub, Endocrinology, Abdominal Center, Helsinki University Hospital and University of Helsinki, Helsinki, Finland

## Contents

|                                                                |    |
|----------------------------------------------------------------|----|
| Search strategy.....                                           | 2  |
| Additional sources.....                                        | 4  |
| Grey literature.....                                           | 5  |
| Table S1. List of records excluded after full text review..... | 8  |
| Table S2. Studies included in each review .....                | 26 |
| Table S3. Funding information of the included reviews.....     | 42 |
| Table S4. Quality of the included reviews .....                | 44 |

# Search strategy

## Pubmed:

Keywords: ((telemedicine) OR (telehealth) OR (digital health) OR (ehealth) OR (e-health) OR (mhealth) OR (m-health) OR (web-based) OR (web based)) AND ((obesity) OR (overweight) OR (weight loss) OR (weight maintenance) OR (weight management))

filters: Review, Systematic Review, Meta-Analysis, in the last 5 years, Adult: 19+ years

## Scopus:

Keywords: ((telemedicine) OR (telehealth) OR (digital health) OR (ehealth) OR (e-health) OR (mhealth) OR (m-health) OR (web-based) OR (web based)) AND ((obesity) OR (overweight) OR (weight loss) OR (weight maintenance) OR (weight management))

limit to medicine, psychology; child, adolescent; document type review; publication year > 2017 and < 2024

## Ovid:

Keywords: ((telemedicine) OR (telehealth) OR (digital health) OR (ehealth) OR (e-health) OR (mhealth) OR (m-health) OR (web-based) OR (web based)) AND ((obesity) OR (overweight) OR (weight loss) OR (weight maintenance) OR (weight management))

include related terms; limit to ("review articles" and humans and yr="2018 -Current" and "all adult (19 plus years)")

## Web of Science:

SK combined two queries:

#1 ((telemedicine) OR (telehealth) OR (digital health) OR (ehealth) OR (e-health) OR (mhealth) OR (m-health) OR (web-based) OR (web based)) AND ((obesity) OR (overweight) OR (weight loss) OR (weight maintenance)) (All Fields) and Review Article (Document Types)

AND

#2 ALL=(child OR adolescent OR postpartum OR pregnant)

AFTER WHICH

#1 NOT #2 limited to review articles; custom range: 2018-01-01 to 2023-this-day

AJ formatted one query:

(ALL=(((telemedicine) OR (telehealth) OR (digital health) OR (ehealth) OR (e-health) OR (mhealth) OR (m-health) OR (web-based) OR (web based)) AND ((obesity) OR (overweight) OR (weight loss) OR (weight maintenance) OR (weight management)) )) NOT ALL=((child OR adolescent OR postpartum OR pregnant OR teen OR teenager OR (bariatric) surgery)) and Review Article (Document Types) and 2023 or 2022 or 2021 or 2020 or 2019 or 2018 (Publication Years)

SK retrieved 725 articles and the AJ 745 articles, after duplicate deletion the final number of retrieved articles was 1118.

#### **APA PsycNet:**

Keywords: ((Any Field: telemedicine) OR (Any Field: telehealth) OR (Any Field: digital health) OR (Any Field: ehealth) OR (Any Field: e-health) OR (Any Field: mhealth) OR (Any Field: m-health) OR (Any Field: web-based) OR (Any Field: web based)) AND ((Any Field: obesity) OR (Any Field: overweight) OR (Any Field: weight loss) OR (Any Field: weight maintenance) OR (Any Field: weight management)) AND Any Field: review AND Age Group: Adulthood (18 yrs & older)

limit to adulthood

#### **Cochrane:**

<https://www.cochranelibrary.com/advanced-search/search-manager>

combine two queries:

#1 ((telemedicine) OR (telehealth) OR (digital health) OR (ehealth) OR (e-health) OR (mhealth) OR (m-health) OR (web-based) OR (web based)) AND ((obesity) OR (overweight) OR (weight loss) OR (weight maintenance))

#2 child OR adolescent OR pediatric OR pregnant OR postpartum

#1 NOT #2

limit topics to endocrine & metabolic and further to obesity & overweight

**Centre for Review and Dissemination (CRD):**

<https://www.crd.york.ac.uk/CRDWeb/>

Keywords: ((telemedicine) OR (telehealth) OR (digital health) OR (ehealth) OR (e-health) OR (mhealth) OR (m-health) OR (web-based) OR (web based)) AND ((obesity) OR (overweight) OR (weight loss) OR (weight maintenance) OR (weight management)) AND (review)

limit to publication years 2018-2023

## Additional sources

### REFERENCE LISTS OF PUBLISHED REVIEWS

To collect this list of potential sources of references, we listed reviews (of reviews) encountered during the main screening process as well as professional recommendations made by the authors of this systematic review.

|                                                                                                                                                                                                                                                                                                                |                                        |
|----------------------------------------------------------------------------------------------------------------------------------------------------------------------------------------------------------------------------------------------------------------------------------------------------------------|----------------------------------------|
| Ryan K, Dockray S, Linehan C. A systematic review of tailored eHealth interventions for weight loss. Digit Health. 2019 Feb 5;5:2055207619826685. doi: 10.1177/2055207619826685. PMID: 30783535; PMCID: PMC6366004.                                                                                            | no new references                      |
| Hinchliffe N, Capehorn MS, Bewick M, Feenie J. The Potential Role of Digital Health in Obesity Care. Adv Ther. 2022 Oct;39(10):4397-4412. doi: 10.1007/s12325-022-02265-4. Epub 2022 Aug 4. PMID: 35925469; PMCID: PMC9362065.                                                                                 | one new reference: Dounavi et al. 2019 |
| Wang Y, Min J, Khuri J, Xue H, Xie B, A Kaminsky L, J Cheskin L. Effectiveness of Mobile Health Interventions on Diabetes and Obesity Treatment and Management: Systematic Review of Systematic Reviews. JMIR Mhealth Uhealth. 2020 Apr 28;8(4):e15400. doi: 10.2196/15400. PMID: 32343253; PMCID: PMC7218595. | no new references                      |

|                                                                                                                                                                                                                                                                                                                                                                                                      |                                      |
|------------------------------------------------------------------------------------------------------------------------------------------------------------------------------------------------------------------------------------------------------------------------------------------------------------------------------------------------------------------------------------------------------|--------------------------------------|
| Marcolino MS, Oliveira JAQ, D'Agostino M, Ribeiro AL, Alkmim MBM, Novillo-Ortiz D. The Impact of mHealth Interventions: Systematic Review of Systematic Reviews. JMIR Mhealth Uhealth. 2018 Jan 17;6(1):e23. doi: 10.2196/mhealth.8873. PMID: 29343463; PMCID: PMC5792697.                                                                                                                           | no new references                    |
| Kahan S, Look M, Fitch A. The benefit of telemedicine in obesity care. Obesity (Silver Spring). 2022 Mar;30(3):577-586. doi: 10.1002/oby.23382. PMID: 35195367.                                                                                                                                                                                                                                      | no new references                    |
| Hutchesson MJ, Gough C, Müller AM, Short CE, Whatnall MC, Ahmed M, Pearson N, Yin Z, Ashton LM, Maher C, Staiano AE, Mauch CE, DeSmet A, Vandelanotte C. eHealth interventions targeting nutrition, physical activity, sedentary behavior, or obesity in adults: A scoping review of systematic reviews. Obes Rev. 2021 Oct;22(10):e13295. doi: 10.1111/obr.13295. Epub 2021 Jun 23. PMID: 34159684. | no new references                    |
| Ufholz K, Bhargava D. A Review of Telemedicine Interventions for Weight Loss. Curr Cardiovasc Risk Rep. 2021;15(9):17. doi: 10.1007/s12170-021-00680-w. Epub 2021 Jul 15. PMID: 34306296; PMCID: PMC8280385.                                                                                                                                                                                         | one new reference Houser et al. 2019 |
| Vasselli JR, Juray S, Trasino SE. Success and failures of telehealth during COVID-19 should inform digital applications to combat obesity. Obes Sci Pract. 2021 Aug 19;8(2):254-258. doi: 10.1002/osp4.551. PMID: 34540264; PMCID: PMC8441632.                                                                                                                                                       | no new references                    |

## Grey literature

### REGULATORY AGENCIES

The Agency for Healthcare Research and Quality (USA)

The Institute for Quality and Efficiency in Health Care (Germany)

The Institute of Medicine in the US (Institute of Medicine 2011, Agency for Healthcare Research and Quality 2014, Institute for Quality and Efficiency in Health Care 2020)

### DATABASES

### **TROVE (Australia)**

<https://trove.nla.gov.au/>

Keywords: obesity AND ("weight loss" OR "weight loss management" OR "weight management" Year range to: 2023 Year range from: 2018 Format: Review

no relevant studies found

### **Global Index Medicus**

<https://www.globalindexmedicus.net/>

tw:(((telemedicine) OR (telehealth) OR (digital health) OR (ehealth) OR (e-health) OR (mhealth) OR (m-health) OR (web-based) OR (web based)) AND ((obesity) OR (overweight) OR (weight loss) OR (weight maintenance) OR (weight management))) AND ( type\_of\_study:("systematic\_reviews" OR "sysrev\_observational\_studies")) AND (year\_cluster:[2018 TO 2023])

100 search results, no relevant studies

### **International HTA Database (INAHTA)**

<https://database.inahta.org/>

Keywords: ((telemedicine) OR (telehealth) OR (digital health) OR (ehealth) OR (e-health) OR (mhealth) OR (m-health) OR (web-based) OR (web based)) AND ((obesity) OR (overweight) OR (weight loss) OR (weight maintenance) OR (weight management))) from 2018-2023; 46 hits, no relevant

46 search results, no relevant reviews.

### **Data Archiving and Network Services (DANS)**

<https://easy.dans.knaw.nl/ui/home>

Keywords: ((telemedicine) OR (telehealth) OR (digital health) OR (ehealth) OR (e-health) OR (mhealth) OR (m-health) OR (web-based) OR (web based)) AND ((obesity) OR (overweight) OR (weight loss) OR (weight maintenance) OR (weight management))

No relevant results.

## **TRIAL REGISTRIES**

### **International prospective register of systematic reviews (PROSPERO)**

<https://www.crd.york.ac.uk/prospero/>

Keywords: obesity AND ("weight loss" OR "weight loss maintenance" OR "weight maintenance") AND (Review\_Completed\_not\_published OR Review\_Completed\_published):RS AND (Systematic Review):RT

198 search results, no additional relevant ongoing or completed reviews.

### **Systematic Review Data Repository Plus (SRDR+)**

<https://srdplus.ahrq.gov/>

Keywords: ((telemedicine) OR (telehealth) OR (digital health) OR (ehealth) OR (e-health) OR (mhealth) OR (m-health) OR (web-based) OR (web based)) AND ((obesity) OR (overweight) OR (weight loss) OR (weight maintenance) OR (weight management))

No relevant results.

**Table S1.** List of records excluded after full text review

| First author(s)            | Pub year | Title                                                                                                                                                                                 | Publication                                                                                     | Pub date    | Volume (issue) | Pages     | doi                        | issn and isbn               | Reason for exclusion | Notes                                                                |
|----------------------------|----------|---------------------------------------------------------------------------------------------------------------------------------------------------------------------------------------|-------------------------------------------------------------------------------------------------|-------------|----------------|-----------|----------------------------|-----------------------------|----------------------|----------------------------------------------------------------------|
| Allman-Farinelli, Margaret | 2020     | The efficacy of electronic health interventions targeting improved sleep for achieving prevention of weight gain in adolescents and young to middle-aged adults: A systematic review. | Obesity reviews: an official journal of the International Association for the Study of Obesity  | Jun 2020    | 21(6)          | e13006    | 10.1111/obr.13006          | ISSN:1467-789X (Electronic) | Intervention         | No weight loss intervention.                                         |
| Ballin, Marcel             | 2020     | Digital exercise interventions for improving measures of central obesity: a systematic review.                                                                                        | International journal of public health                                                          | Jun 2020    | 65(5)          | 593-605   | 10.1007/s00038-020-01385-4 | ISSN:1661-8556 (Print)      | Intervention         | No weight loss intervention.                                         |
| Bassi, G.                  | 2021     | Efficacy of ehealth interventions for adults with diabetes: A systematic review and meta-analysis                                                                                     | .                                                                                               | 2021        | 18(17)         | .         | 10.3390/ijerp18178982      | .                           | Intervention         | Diabetes management, not weight loss, interventions.                 |
| Benajiba, Nada             | 2022     | Technology-based nutrition interventions using the Mediterranean diet: a systematic review                                                                                            | .                                                                                               | 09 May 2022 | 80(6)          | 1419-1433 | 10.1093/nutrit/nuab076     | 0029-6643                   | Intervention         | This is a study on interventions promoting the mediterranean diet.   |
| Canuto, Raquel             | 2021     | Nutritional intervention strategies for the management of overweight and obesity in primary health care: A systematic review with meta-analysis.                                      | Obesity reviews : an official journal of the International Association for the Study of Obesity | 2021        | 22(3)          | e13143    | 10.1111/obr.13143          | 1467-789X                   | Intervention         | No eHealth intervention.                                             |
| Cavero-Redondo, Iván       | 2020     | Effect of Behavioral Weight Management Interventions Using Lifestyle mHealth Self-Monitoring on Weight Loss: A Systematic Review and Meta-Analysis.                                   | Nutrients                                                                                       | 03 Jul 2020 | 12(7)          |           | 10.3390/nu12071977         | 2072-6643                   | Intervention         | Focuses only on self-monitoring, not complete eHealth interventions. |



| First author(s)          | Pub year | Title                                                                                                                                                                  | Publication                                         | Pub date    | Volume (issue) | Pages     | doi                             | issn and isbn               | Reason for exclusion | Notes                                                                                                                                |
|--------------------------|----------|------------------------------------------------------------------------------------------------------------------------------------------------------------------------|-----------------------------------------------------|-------------|----------------|-----------|---------------------------------|-----------------------------|----------------------|--------------------------------------------------------------------------------------------------------------------------------------|
| Chau, Michelle M         | 2018     | The use of social media in nutrition interventions for adolescents and young adults-A systematic review.                                                               | International journal of medical informatics        | Dec 2018    | 120            | 77-91     | 10.1016/j.ijmedinf.2018.10.001  | ISSN:1386-5056 (Print)      | Intervention         | Social media platforms, not eHealth interventions.                                                                                   |
| Cheatham, Scott W        | 2018     | The efficacy of wearable activity tracking technology as part of a weight loss program: a systematic review.                                                           | The Journal of sports medicine and physical fitness | Apr 2018    | 58(4)          | 534-548   | 10.23736/S0022-4707.17.07437-0  | ISSN:1827-1928 (Electronic) | Intervention         | Wearable devices, not eHealth interventions.                                                                                         |
| Chen, D.                 | 2020     | Effect of electronic health interventions on metabolic syndrome: A systematic review and meta-analysis                                                                 | .                                                   | 2020        | 10(10)         |           | 10.1136/bmjopen-2020-036927     | .                           | Intervention         | Intervention focuses on metabolic syndrome.                                                                                          |
| Cordella, P.             | 2021     | Coaching for the treatment of obesity and overweight: a systematic review                                                                                              | .                                                   | 2021        | 149(11)        | 1594-1605 | 10.4067/S0034-98872021001101594 | .                           | Intervention         | Interventions include remote coaching (e.g. via telephone) but are not digital interventions as specified in the inclusion criteria. |
| Enyioha, Chineme         | 2022     | Effectiveness of Mobile Phone and Web-Based Interventions for Diabetes and Obesity Among African American and Hispanic Adults in the United States: Systematic Review. | JMIR public health and surveillance                 | 04 Feb 2022 | 8(2)           | e25890    | 10.2196/25890                   | ISSN:2369-2960 (Electronic) | Intervention         | Intervention types not applicable when compared to inclusion criteria.                                                               |
| Fawcett, Emily           | 2020     | Long-Term Weight Management Using Wearable Technology in Overweight and Obese Adults: Systematic Review.                                                               | JMIR mHealth and uHealth                            | 10 Mar 2020 | 8(3)           | e13461    | 10.2196/13461                   | ISSN:2291-5222 (Electronic) | Intervention         | .                                                                                                                                    |
| Gómez-de-Regil, Lizzette | 2020     | Mobile Apps for the Management of Comorbid Overweight/Obesity and Depression/Anxiety: A Systematic Review.                                                             | Journal of healthcare engineering                   | 2020        | 2020           | 9317179   | 10.1155/2020/9317179            | ISSN:2040-2295 (Print)      | Intervention         | No weight loss intervention.                                                                                                         |

| First author(s)       | Pub year | Title                                                                                                                                                                                                     | Publication                                                       | Pub date | Volume (issue) | Pages        | doi                          | issn and isbn               | Reason for exclusion | Notes                                                                           |
|-----------------------|----------|-----------------------------------------------------------------------------------------------------------------------------------------------------------------------------------------------------------|-------------------------------------------------------------------|----------|----------------|--------------|------------------------------|-----------------------------|----------------------|---------------------------------------------------------------------------------|
| Hangaard , S.         | 2021     | The Effectiveness of Telemedicine Solutions for the Management of Type 2 Diabetes: A Systematic Review, Meta-Analysis, and Meta-Regression                                                                | .                                                                 | 2021     | .              | .            | 10.1177/19322968211064633    | .                           | Intervention         | Interventions for type 2 diabetes, not weight loss.                             |
| Harris, Leanne        | 2018     | The effects of multi-component weight management interventions on weight loss in adults with intellectual disabilities and obesity: A systematic review and meta-analysis of randomised controlled trials | Res Dev Disabil                                                   | Jan 2018 | 72             | 42-55        | 10.1016/j.ridd.2017.10.021   | 1873-3379                   | Intervention         | No eHealth intervention.                                                        |
| Jo, Ara               | 2019     | Is There a Benefit to Patients Using Wearable Devices Such as Fitbit or Health Apps on Mobiles? A Systematic Review.                                                                                      | The American journal of medicine                                  | Dec 2019 | 132(12)        | 1394-1400.e1 | 10.1016/j.amjmed.2019.06.018 | ISSN:1555-7162 (Electronic) | Intervention         | .                                                                               |
| Joseph, Rodney P.     | 2019     | A Systematic Review of Electronic and Mobile Health (e-and mHealth) Physical Activity Interventions for African American and Hispanic Women                                                               | .                                                                 | Mar 2019 | 16(3)          | 230-239      | 10.1123/jpah.2018-0103       | 1543-3080                   | Intervention         | No weight loss intervention.                                                    |
| Jung, J.              | 2022     | Promoting Physical Activity and Weight Loss With mHealth Interventions Among Workers: Systematic Review and Meta-analysis of Randomized Controlled Trials                                                 | .                                                                 | 2022     | 10(1)          | .            | 10.2196/30682                | .                           | Intervention         | Interventions target physical activity, not interventions for weight loss.      |
| Lozano-Chacon, Blanca | 2021     | Use and Effectiveness of Social-Media-Delivered Weight Loss Interventions among Teenagers and Young Adults: A Systematic Review.                                                                          | International journal of environmental research and public health | 2021     | 18(16)         | .            | 10.3390/ijerp18168493        | 1660-4601                   | Intervention         | Studies social media, not the types of interventions of interest in this study. |

| First author(s)   | Pub year | Title                                                                                                                                                                             | Publication                          | Pub date    | Volume (issue) | Pages   | doi                          | issn and isbn          | Reason for exclusion | Notes                                                       |
|-------------------|----------|-----------------------------------------------------------------------------------------------------------------------------------------------------------------------------------|--------------------------------------|-------------|----------------|---------|------------------------------|------------------------|----------------------|-------------------------------------------------------------|
| Maciejewski, M.L. | 2018     | Systematic Review of Behavioral Weight Management Program MOVE! for Veterans                                                                                                      | .                                    | 2018        | 54(5)          | 704-714 | 10.1016/j.amepre.2018.01.029 | .                      | Intervention         | .                                                           |
| Malkawi, A.M.     | 2018     | Dietary, physical activity, and weight management interventions among active-duty military personnel: A systematic review                                                         | .                                    | 2018        | 5(1)           | .       | 10.1186/s40779-018-0190-5    | .                      | Intervention         | No weight loss intervention.                                |
| Moghimi, Elnaz    | 2021     | The Efficacy of eHealth Interventions for the Treatment of Adults Diagnosed With Full or Subthreshold Binge Eating Disorder: Systematic Review and Meta-analysis.                 | Journal of medical Internet research | 20 Jul 2021 | 23(7)          | e17874  | 10.2196/17874                | ISSN:1439-4456 (Print) | Intervention         | .                                                           |
| Morrill, K.E.     | 2021     | Weight Loss Interventions for Hispanic Women in the United States: A Systematic Review                                                                                            | .                                    | 2021        | 2021           | .       | 10.1155/2021/8714873         | .                      | Intervention         | No digital intervention.                                    |
| Nitschke, Erin    | 2022     | Impact of Nutrition and Physical Activity Interventions Provided by Nutrition and Exercise Practitioners for the Adult General Population: A Systematic Review and Meta-Analysis. | Nutrients                            | 2022        | 14(9)          | .       | 10.3390/nu14091729           | 2072-6643              | Intervention         | No weight loss intervention.                                |
| Oh, Y.J.          | 2021     | A systematic review of artificial intelligence chatbots for promoting physical activity, healthy diet, and weight loss                                                            | .                                    | 2021        | 18(1)          | .       | 10.1186/s12966-021-01224-6   | .                      | Intervention         | Studies the use of AI, no interventions of interest.        |
| Park, SH          | 2019     | Effect of Mobile Health on Obese Adults: A Systematic Review and Meta-Analysis                                                                                                    | .                                    | Jan 2019    | 25(1)          | 12-26   | 10.4258/hir.2019.25.1.12     | 2093-3681              | Intervention         | Interventions in focus not in line with inclusion criteria. |

| First author(s)      | Pub year | Title                                                                                                                                                                                              | Publication                                 | Pub date    | Volume (issue) | Pages     | doi                            | issn and isbn               | Reason for exclusion | Notes                                            |
|----------------------|----------|----------------------------------------------------------------------------------------------------------------------------------------------------------------------------------------------------|---------------------------------------------|-------------|----------------|-----------|--------------------------------|-----------------------------|----------------------|--------------------------------------------------|
| Peng, S.             | 2023     | The Effectiveness of E-Health Interventions Promoting Physical Activity and Reducing Sedentary Behavior in College Students: A Systematic Review and Meta-Analysis of Randomized Controlled Trials | .                                           | 2023        | 20(1)          | .         | 10.3390/ijerp h20010318        | .                           | Intervention         | .                                                |
| Petkovic, Jennifer   | 2021     | Behavioural interventions delivered through interactive social media for health behaviour change, health outcomes, and health equity in the adult population.                                      | The Cochrane database of systematic reviews | 31 May 2021 | 5(5)           | CD012932  | 10.1002/14651858.CD012932.pub2 | ISSN:1469-493X (Electronic) | Intervention         | .                                                |
| Platini, H.          | 2023     | Systematic Review and Meta-Analysis of Telecoaching for Self-Care Management among Persons with Type 2 Diabetes Mellitus                                                                           | .                                           | 2023        | 20(1)          | .         | 10.3390/ijerp h20010237        | .                           | Intervention         | Telecoaching for type 2 diabetes.                |
| Raber, Margaret      | 2021     | A systematic review of the use of dietary self-monitoring in behavioural weight loss interventions: delivery, intensity and effectiveness                                                          | Public Health Nutr                          | Dec 2021    | 24(17)         | 5885-5913 | 10.1017/S136898002100358X      | 1475-2727                   | Intervention         | Examines self-monitoring, focus not weight loss. |
| Sittig, S.           | 2020     | Extensive Review of Persuasive System Design Categories and Principles: Behavioral Obesity Interventions                                                                                           | .                                           | 2020        | 44(7)          | .         | 10.1007/s10916-020-01591-w     | .                           | Intervention         | .                                                |
| Stockwell, Stephanie | 2019     | Digital behavior change interventions to promote physical activity and/or reduce sedentary behavior in older adults: A systematic review and meta-analysis                                         | .                                           | Jun 2019    | 120            | 68-87     | 10.1016/j.exger.2019.02.020    | 0531-5565                   | Intervention         | .                                                |

| First author(s)     | Pub year | Title                                                                                                                                                                 | Publication                                 | Pub date    | Volume (issue) | Pages   | doi                            | issn and isbn               | Reason for exclusion | Notes                                                    |
|---------------------|----------|-----------------------------------------------------------------------------------------------------------------------------------------------------------------------|---------------------------------------------|-------------|----------------|---------|--------------------------------|-----------------------------|----------------------|----------------------------------------------------------|
| Wong, Sai Ho        | 2022     | Wearable technology-delivered lifestyle intervention amongst adults with overweight and obese: A systematic review and meta-regression.                               | International journal of nursing studies    | 2022        | 127            | 104163  | 10.1016/j.ijnurstu.2021.104163 | 1873-491X                   | Intervention         | .                                                        |
| Xu, Y.              | 2021     | The efficacy of mobile health in alleviating risk factors related to the occurrence and development of coronary heart disease: A systematic review and meta-analysis  | .                                           | 2021        | 44(5)          | 609-619 | 10.1002/clc.23596              | .                           | Intervention         | .                                                        |
| Young, Claire       | 2019     | Supporting Engagement, Adherence, and Behavior Change in Online Dietary Interventions.                                                                                | Journal of nutrition education and behavior | Jun 2019    | 51(6)          | 719-739 | 10.1016/j.jneb.2019.03.006     | ISSN:1878-2620 (Electronic) | Intervention         | .                                                        |
| Zhang, Meng         | 2022     | Efficacy of Mobile Health Applications to Improve Physical Activity and Sedentary Behavior: A Systematic Review and Meta-Analysis for Physically Inactive Individuals | .                                           | Apr 2022    | 19(8)          | .       | 10.3390/ijerph19084905         | 1660-4601                   | Intervention         | Focuses on physical activity, not weight loss            |
| Arsenijevic, Jelena | 2020     | Adherence to Electronic Health Tools Among Vulnerable Groups: Systematic Literature Review and Meta-Analysis.                                                         | Journal of medical Internet research        | 06 Feb 2020 | 22(2)          | e11613  | 10.2196/11613                  | ISSN:1439-4456 (Print)      | Outcome              | .                                                        |
| Chatterjee, A.      | 2021     | Digital interventions on healthy lifestyle management: Systematic review                                                                                              | .                                           | 2021        | 23(11)         | .       | 10.2196/26931                  | .                           | Outcome              | Outcome healthy lifestyle behaviours, not weight change. |
| Chen, Yang          | 2020     | The Promotion of Eating Behaviour Change through Digital Interventions                                                                                                | .                                           | Oct 2020    | 17(20)         | .       | 10.3390/ijerph17207488         | 1660-4601                   | Outcome              | Intervention for healthy eating, not weight loss.        |

| First author(s)  | Pub year | Title                                                                                                                                                                                                                                         | Publication                                                                                     | Pub date    | Volume (issue) | Pages     | doi                       | issn and isbn               | Reason for exclusion | Notes                         |
|------------------|----------|-----------------------------------------------------------------------------------------------------------------------------------------------------------------------------------------------------------------------------------------------|-------------------------------------------------------------------------------------------------|-------------|----------------|-----------|---------------------------|-----------------------------|----------------------|-------------------------------|
| Cheng, Christina | 2020     | Applying the Electronic Health Literacy Lens: Systematic Review of Electronic Health Interventions Targeted at Socially Disadvantaged Groups                                                                                                  | .                                                                                               | 13 Aug 2020 | 22(8)          | .         | 10.2196/18476             | 1438-8871                   | Outcome              | No weight loss intervention.  |
| Christopolou, SC | 2018     | Evidence-based health and clinical informatics: a systematic review on randomized controlled trials                                                                                                                                           | .                                                                                               | May 2018    | 8(1-2)         | 137-150   | 10.1007/s12553-016-0170-2 | 2190-7188                   | Outcome              | Outcome not weight change.    |
| Cotie, L M       | 2018     | The effectiveness of eHealth interventions on physical activity and measures of obesity among working-age women: a systematic review and meta-analysis.                                                                                       | Obesity reviews : an official journal of the International Association for the Study of Obesity | Oct 2018    | 19(10)         | 1340-1358 | 10.1111/obr.12700         | ISSN:1467-789X (Electronic) | Outcome              | focuses on physical activity  |
| Dao, Kim Phuong  | 2021     | Smartphone-Delivered Ecological Momentary Interventions Based on Ecological Momentary Assessments to Promote Health Behaviors: Systematic Review and Adapted Checklist for Reporting Ecological Momentary Assessment and Intervention Studies | .                                                                                               | 02 Nov 2021 | 9(11)          | .         | 10.2196/22890             | 2291-5222                   | Outcome              | .                             |
| Duan, Y.         | 2021     | Effects of eHealth-based multiple health behavior change interventions on physical activity, healthy diet, and weight in people with noncommunicable diseases: Systematic review and meta-analysis                                            | .                                                                                               | 2021        | 23(2)          | .         | 10.2196/23786             | .                           | Outcome              | does not focus on weight loss |

| First author(s)      | Pub year | Title                                                                                                                             | Publication                                                       | Pub date    | Volume (issue) | Pages   | doi                          | issn and isbn               | Reason for exclusion | Notes                                                                                         |
|----------------------|----------|-----------------------------------------------------------------------------------------------------------------------------------|-------------------------------------------------------------------|-------------|----------------|---------|------------------------------|-----------------------------|----------------------|-----------------------------------------------------------------------------------------------|
| Gentili, A.          | 2022     | The cost-effectiveness of digital health interventions: A systematic review of the literature                                     | .                                                                 | 2022        | 10             | .       | 10.3389/fpubh.2022.787135    | .                           | Outcome              | .                                                                                             |
| Hu, Ruiqi            | 2020     | Perspectives of People Who Are Overweight and Obese on Using Wearable Technology for Weight Management: Systematic Review.        | JMIR mHealth and uHealth                                          | 13 Jan 2020 | 8(1)           | e12651  | 10.2196/12651                | ISSN:2291-5222 (Electronic) | Outcome              | .                                                                                             |
| Jeem, Yaltafit Abror | 2022     | The Use of Mobile Health Interventions for Outcomes among Middle-Aged and Elderly Patients with Prediabetes: A Systematic Review. | International journal of environmental research and public health | 20 Oct 2022 | 19(20)         | .       | 10.3390/ijerph192013638      | ISSN:1661-7827 (Print)      | Outcome              | Outcome health behaviour and diabetes incidence, not about eHealth weight loss interventions. |
| Knowlden , A.P.      | 2022     | Systematic review of electronically delivered behavioral obesity prevention interventions targeting men                           | .                                                                 | 2022        | 23(9)          | .       | 10.1111/obr.13456            | .                           | Outcome              | Assessed different types of interventions available, not efficacy..                           |
| Oikonomidi, Theodora | 2019     | A Methodologic Systematic Review of Mobile Health Behavior Change Randomized Trials                                               | .                                                                 | Dec 2019    | 57(6)          | 836-843 | 10.1016/j.amepre.2019.07.008 | 0749-3797                   | Outcome              | .                                                                                             |
| Patel, M.L.          | 2019     | Motivational interviewing in eHealth and telehealth interventions for weight loss: A systematic review                            | .                                                                 | 2019        | 126            | .       | 10.1016/j.yjpm.2019.05.026   | .                           | Outcome              | Studies motivational interviewing, no weight loss intervention.                               |
| Patel, Michele L     | 2021     | Self-Monitoring via Digital Health in Weight Loss Interventions: A Systematic Review Among Adults with Overweight or Obesity.     | Obesity (Silver Spring, Md.)                                      | Mar 2021    | 29(3)          | 478-499 | 10.1002/oby.23088            | ISSN:1930-739X (Electronic) | Outcome              | .                                                                                             |
| Robert, Caroline     | 2021     | Effectiveness of eHealth Nutritional Interventions for Middle-Aged and Older                                                      | .                                                                 | 17 May 2021 | 23(5)          | .       | 10.2196/15649                | 1438-8871                   | Outcome              | Focuses on nutrition, not weight loss                                                         |

| First author(s)                 | Pub year | Title                                                                                                                                                                                                             | Publication | Pub date | Volume (issue) | Pages   | doi                        | issn and isbn | Reason for exclusion | Notes                                                                                                                                  |
|---------------------------------|----------|-------------------------------------------------------------------------------------------------------------------------------------------------------------------------------------------------------------------|-------------|----------|----------------|---------|----------------------------|---------------|----------------------|----------------------------------------------------------------------------------------------------------------------------------------|
|                                 |          | Adults: Systematic Review and Meta-analysis                                                                                                                                                                       |             |          |                |         |                            |               |                      |                                                                                                                                        |
| Rocha, Norma Patricia Rodriguez | 2019     | eHealth Interventions for Fruit and Vegetable Intake: A Meta-Analysis of Effectiveness                                                                                                                            | .           | Dec 2019 | 46(6)          | 947-959 | 10.1177/1090198119859396   | 1090-1981     | Outcome              | No weight loss intervention.                                                                                                           |
| Ryan, K.                        | 2019     | A systematic review of tailored eHealth interventions for weight loss                                                                                                                                             | .           | 2019     | 5              | .       | 10.1177/2055207619826685   | .             | Outcome              | Investigates the types and effects of tailoring, not the outcomes of weight loss interventions as specified in the inclusion criteria. |
| Salwen-Deremer, J.K.            | 2020     | Incorporating Health Behavior Theory into mHealth: an Examination of Weight Loss, Dietary, and Physical Activity Interventions                                                                                    | .           | 2020     | 5(1)           | 51-60   | 10.1007/s41347-019-00118-6 | .             | Outcome              | .                                                                                                                                      |
| Scarry, Alan                    | 2022     | Usage of Mobile Applications or Mobile Health Technology to Improve Diet Quality in Adults                                                                                                                        | .           | Jun 2022 | 14(12)         | .       | 10.3390/nu14122437         | 2072-6643     | Outcome              | .                                                                                                                                      |
| Sediva, Hana                    | 2022     | Behavior Change Techniques in Digital Health Interventions for Midlife Women: Systematic Review                                                                                                                   | .           | Nov 2022 | 10(11)         | .       | 10.2196/37234              | 2291-5222     | Outcome              | This is about BCT:s, not weight loss                                                                                                   |
| Sequi-Dominguez, I.             | 2020     | Effectiveness of mobile health interventions promoting physical activity and lifestyle interventions to reduce cardiovascular risk among individuals with metabolic syndrome: Systematic review and meta-analysis | .           | 2020     | 22(8)          | .       | 10.2196/17790              | .             | Outcome              | targeting cardiometabolic factors; not weight loss interventions                                                                       |



| First author(s)   | Pub year | Title                                                                                                                                                                                                                         | Publication | Pub date    | Volume (issue) | Pages     | doi                          | issn and isbn | Reason for exclusion | Notes                                            |
|-------------------|----------|-------------------------------------------------------------------------------------------------------------------------------------------------------------------------------------------------------------------------------|-------------|-------------|----------------|-----------|------------------------------|---------------|----------------------|--------------------------------------------------|
| Sharkey, Thomas   | 2020     | Effectiveness of gender-targeted versus gender-neutral interventions aimed at improving dietary intake, physical activity and/or overweight/obesity in young adults (aged 17-35 years): a systematic review and meta-analysis | Nutr J      | 30 Jul 2020 | 19(1)          | 78        | 10.1186/s12937-020-00594-0   | 1475-2891     | Outcome              | Focus not on weight loss.                        |
| Shoneye, C.L.     | 2022     | Dietary assessment methods used in adult digital weight loss interventions: A systematic literature review                                                                                                                    | .           | 2022        | .              | .         | 10.1111/jhn.13101            | .             | Outcome              | .                                                |
| Sieczkowska, S.M. | 2021     | Health Coaching Strategies for Weight Loss: A Systematic Review and Meta-Analysis                                                                                                                                             | .           | 2021        | 12(4)          | 1449-1460 | 10.1093/advances/nmaa159     | .             | Outcome              | Outcome not weight change.                       |
| Smith, N.         | 2020     | A systematic review of the dose-response relationship between usage and outcomes of online physical activity weight-loss interventions                                                                                        | .           | 2020        | 22             | .         | 10.1016/j.invent.2020.100344 | .             | Outcome              | .                                                |
| Szinay, Dorothy   | 2020     | Influences on the Uptake of and Engagement With Health and Well-Being Smartphone Apps: Systematic Review                                                                                                                      | .           | 29 May 2020 | 22(5)          | .         | 10.2196/17572                | 1438-8871     | Outcome              | .                                                |
| Van Rhoon, L.     | 2020     | A systematic review of the behaviour change techniques and digital features in technology-driven type 2 diabetes prevention interventions                                                                                     | .           | 2020        | 6              | .         | 10.1177/2055207620914427     | .             | Outcome              | Focuses on diabetes prevention, not weight loss. |
| Villinger, K      | 2019     | The effectiveness of app-based mobile interventions on nutrition behaviours and nutrition-related health                                                                                                                      | .           | Oct 2019    | 20(10)         | 1465-1484 | 10.1111/obr.12903            | 1467-7881     | Outcome              | Focuses on nutrition behaviour.                  |

| First author(s)        | Pub year | Title                                                                                                                                                                 | Publication              | Pub date    | Volume (issue) | Pages     | doi                           | issn and isbn               | Reason for exclusion | Notes                                                                                                  |
|------------------------|----------|-----------------------------------------------------------------------------------------------------------------------------------------------------------------------|--------------------------|-------------|----------------|-----------|-------------------------------|-----------------------------|----------------------|--------------------------------------------------------------------------------------------------------|
|                        |          | outcomes: A systematic review and meta-analysis                                                                                                                       |                          |             |                |           |                               |                             |                      |                                                                                                        |
| Willmott, Taylor       | 2019     | Reported theory use in electronic health weight management interventions targeting young adults: a systematic review.                                                 | Health psychology review | Sep 2019    | 13(3)          | 295-317   | 10.1080/17437199.2019.1625280 | ISSN:1743-7202 (Electronic) | Outcome              | .                                                                                                      |
| Wu, X.                 | 2019     | The efficacy of mobile phone apps for lifestyle modification in diabetes: Systematic review and meta-analysis                                                         | .                        | 2019        | 7(1)           | .         | 10.2196/12297                 | .                           | Outcome              | .                                                                                                      |
| Yang, M.               | 2023     | Effects of Face-to-Face and eHealth Blended Interventions on Physical Activity, Diet, and Weight-Related Outcomes among Adults: A Systematic Review and Meta-Analysis | .                        | 2023        | 20(2)          | .         | 10.3390/ijerph20021560        | .                           | Outcome              | Outcome physical activity and diet.                                                                    |
| Yang, Qinghua          | 2020     | The Effectiveness of Interactivity in Improving Mediating Variables, Behaviors and Outcomes of Web-Based Health Interventions: A Meta-Analytic Review                 | .                        | 18 Sep 2020 | 35(11)         | 1334-1348 | 10.1080/10410236.2019.1631992 | 1041-0236                   | Outcome              | Focuses on features, not on weight loss outcomes                                                       |
| Ziegeldorf , Alexandra | 2020     | Effects of media-assisted therapeutic approaches on physical activity of obese adults: a systematic review.                                                           | BMC endocrine disorders  | 21 Feb 2020 | 20(1)          | 28        | 10.1186/s12902-020-0505-x     | ISSN:1472-6823 (Electronic) | Outcome              | Focuses on physical activity, not weight loss                                                          |
| Berry, MP              | 2022     | Associations between behaviour change technique clusters and weight loss outcomes of automated digital interventions: a systematic review and meta-regression         | .                        | .           | .              | .         | 10.1080/17437199.2022.2125038 | 1743-7199                   | Outcome              | Investigates how to build an effective fully automated intervention using behaviour change techniques. |

| First author(s)              | Pub year | Title                                                                                                                                                                                                                   | Publication                                                                                     | Pub date     | Volume (issue) | Pages   | doi                           | issn and isbn          | Reason for exclusion | Notes                                                            |
|------------------------------|----------|-------------------------------------------------------------------------------------------------------------------------------------------------------------------------------------------------------------------------|-------------------------------------------------------------------------------------------------|--------------|----------------|---------|-------------------------------|------------------------|----------------------|------------------------------------------------------------------|
| Bremer, W.                   | 2022     | Recruitment and retention in mobile application-based intervention studies: a critical synopsis of challenges and opportunities                                                                                         | .                                                                                               | 2022         | .              | .       | 10.1080/17538157.2022.2082297 | .                      | Outcomr              | Studies recruitment and retention.                               |
| Asbjornsen, Rikke Aune       | 2019     | Persuasive System Design Principles and Behavior Change Techniques to Stimulate Motivation and Adherence in Electronic Health Interventions to Support Weight Loss Maintenance: Scoping Review                          | .                                                                                               | 21 Jun 2019  | 21(6)          | .       | 10.2196/14265                 | 1438-8871              | Population           | .                                                                |
| Brown, Vicki                 | 2021     | A systematic review of economic evaluations of web-based or telephone-delivered interventions for preventing overweight and obesity and/or improving obesity-related behaviors                                          | .                                                                                               | Jul 2021     | 22(7)          | .       | 10.1111/obr.13227             | 1467-7881              | Population           | .                                                                |
| Cai, Xue                     | 2020     | Mobile Application Interventions and Weight Loss in Type 2 Diabetes: A Meta-Analysis.                                                                                                                                   | Obesity (Silver Spring)                                                                         | Mar 2020     | 28(3)          | 502-509 | 10.1002/oby.22715             | 1930-739X<br>1930-7381 | Population           | Diabetes management, not weight loss, interventions.             |
| Consavage Stanley, Katherine | 2022     | A systematic scoping review of the literacy literature to develop a digital food and nutrition literacy model for low-income adults to make healthy choices in the online food retail ecosystem to reduce obesity risk. | Obesity reviews : an official journal of the International Association for the Study of Obesity | Apr 2022     | 23(4)          | e13414  | 10.1111/obr.13414             | ISSN:1467-7881 (Print) | Population           | No weight loss intervention.                                     |
| Delva, Sabianca              | 2021     | Efficacy of Mobile Health for Self-management of Cardiometabolic Risk Factors:                                                                                                                                          | The Journal of cardiovascular nursing                                                           | 2021 Jan/Feb | 36(1)          | 34-55   | 10.1097/JCN.0000000000000659  | ISSN:0889-4655 (Print) | Population           | targeting cardiometabolic factors; not weight loss interventions |

| First author(s)  | Pub year | Title                                                                                                                                                        | Publication                                                                                       | Pub date | Volume (issue) | Pages   | doi                       | issn and isbn               | Reason for exclusion | Notes                                                                                       |
|------------------|----------|--------------------------------------------------------------------------------------------------------------------------------------------------------------|---------------------------------------------------------------------------------------------------|----------|----------------|---------|---------------------------|-----------------------------|----------------------|---------------------------------------------------------------------------------------------|
|                  |          | A Theory-Guided Systematic Review.                                                                                                                           |                                                                                                   |          |                |         |                           |                             |                      |                                                                                             |
| Halligan, Julia  | 2021     | Reducing weight and BMI following gestational diabetes: a systematic review and meta-analysis of digital and telemedicine interventions                      | .                                                                                                 | 2021     | 9(1)           | .       | 10.1136/bmjdr-2020-002077 | 2052-4897                   | Population           | Focuses on people with gestational diabetes.                                                |
| Kim, Gaeun       | 2021     | A Technology-Mediated Interventional Approach to the Prevention of Metabolic Syndrome: A Systematic Review and Meta-Analysis                                 | .                                                                                                 | Jan 2021 | 18(2)          | .       | 10.3390/ijerph18020512    | 1660-4601                   | Population           | Not targeting people with obesity or overweight. About risk factors for metabolic syndrome. |
| Kwon, Oh Young   | 2023     | The Effectiveness of eHealth Interventions on Lifestyle Modification in Patients With Nonalcoholic Fatty Liver Disease: Systematic Review and Meta-analysis. | Journal of medical Internet research                                                              | 2023     | 25             | e37487  | 10.2196/37487             | 1438-8871                   | Population           | Not all participants were obese or overweight. This is about NAFLD, not weight los.         |
| Mertens, L.      | 2019     | Effect of Lifestyle Coaching Including Telemonitoring and Telecoaching on Gestational Weight Gain and Postnatal Weight Loss: A Systematic Review             | .                                                                                                 | 2019     | 25(10)         | 889-901 | 10.1089/tmj.2018.0139     | .                           | Population           | .                                                                                           |
| Messiah, S.E.    | 2020     | Application and effectiveness of eHealth strategies for metabolic and bariatric surgery patients: A systematic review                                        | .                                                                                                 | 2020     | 6              | .       | 10.1177/2055207619898987  | .                           | Population           | .                                                                                           |
| Michaud, Tzeyu L | 2021     | Assessing the Impact of Telemonitoring-Facilitated Lifestyle Modifications on Diabetes Outcomes: A Systematic Review and Meta-Analysis.                      | Telemedicine journal and e-health : the official journal of the American Telemedicine Association | Feb 2021 | 27(2)          | 124-136 | 10.1089/tmj.2019.0319     | ISSN:1556-3669 (Electronic) | Population           | Interventions for diabetes.                                                                 |

| First author(s)           | Pub year | Title                                                                                                                                                                                          | Publication                          | Pub date    | Volume (issue) | Pages           | doi                        | issn and isbn               | Reason for exclusion | Notes                                                                 |
|---------------------------|----------|------------------------------------------------------------------------------------------------------------------------------------------------------------------------------------------------|--------------------------------------|-------------|----------------|-----------------|----------------------------|-----------------------------|----------------------|-----------------------------------------------------------------------|
| O'Connor, M.              | 2018     | The Efficacy and Acceptability of Third-Wave Behavioral and Cognitive eHealth Treatments: A Systematic Review and Meta-Analysis of Randomized Controlled Trials                                | .                                    | 2018        | 49(3)          | 459-475         | 10.1016/j.beth.2017.07.007 | .                           | Population           | .                                                                     |
| Rhodes, Alexandra         | 2020     | Exclusively Digital Health Interventions Targeting Diet, Physical Activity, and Weight Gain in Pregnant Women: Systematic Review and Meta-Analysis                                             | .                                    | 10 Jul 2020 | 8(7)           | .               | 10.2196/18255              | 2291-5222                   | Population           | .                                                                     |
| Robinson, Anna            | 2020     | Digital and Mobile Technologies to Promote Physical Health Behavior Change and Provide Psychological Support for Patients Undergoing Elective Surgery: Meta-Ethnography and Systematic Review. | JMIR mHealth and uHealth             | 01 Dec 2020 | 8(12)          | e19237          | 10.2196/19237              | ISSN:2291-5222 (Electronic) | Population           | .                                                                     |
| Sánchez-Gutiérrez, Carmen | 2022     | Effectiveness of telemedicine psychoeducational interventions for adults with non-oncological chronic disease: A systematic review.                                                            | Journal of advanced nursing          | May 2022    | 78(5)          | 1267-1280       | 10.1111/jan.15151          | ISSN:1365-2648 (Electronic) | Population           | .                                                                     |
| Sung, Meekang             | 2022     | Using an Integrated Framework to Investigate the Facilitators and Barriers of Health Information Technology Implementation in Noncommunicable Disease Management: Systematic Review.           | .                                    | 20 Jul 2022 | 24(7)          | e37338 - e37338 | 10.2196/37338              | 1438-8871                   | Population           | .                                                                     |
| Willmott, Taylor Jade     | 2019     | Weight Management in Young Adults: Systematic Review of Electronic Health                                                                                                                      | Journal of medical Internet research | 06 Feb 2019 | 21(2)          | e10265          | 10.2196/10265              | ISSN:1439-4456 (Print)      | Population           | About primary weight management, not about weight loss or weight loss |

| First author(s)              | Pub year | Title                                                                                                                                                               | Publication                                                                                               | Pub date    | Volume (issue) | Pages     | doi                          | issn and isbn               | Reason for exclusion | Notes                                      |
|------------------------------|----------|---------------------------------------------------------------------------------------------------------------------------------------------------------------------|-----------------------------------------------------------------------------------------------------------|-------------|----------------|-----------|------------------------------|-----------------------------|----------------------|--------------------------------------------|
|                              |          | Intervention Components and Outcomes.                                                                                                                               |                                                                                                           |             |                |           |                              |                             |                      | maintenance. Excluded people with obesity. |
| Wright, Charlene             | 2021     | Are eHealth interventions for adults who are scheduled for or have undergone bariatric surgery as effective as usual care? A systematic review.                     | Surgery for obesity and related diseases : official journal of the American Society for Bariatric Surgery | Dec 2021    | 17(12)         | 2065-2080 | 10.1016/j.soar.d.2021.07.020 | ISSN:1878-7533 (Electronic) | Population           | .                                          |
| Wyse, Rebecca                | 2021     | The Effectiveness of Interventions Delivered Using Digital Food Environments to Encourage Healthy Food Choices: A Systematic Review and Meta-Analysis               | .                                                                                                         | Jul 2021    | 13(7)          | .         | 10.3390/nu13072255           | 2072-6643                   | Population           | .                                          |
| Xie, Li Feng                 | 2020     | Understanding Self-Guided Web-Based Educational Interventions for Patients With Chronic Health Conditions: Systematic Review of Intervention Features and Adherence | .                                                                                                         | 13 Aug 2020 | 22(8)          | .         | 10.2196/18355                | 1438-8871                   | Population           | .                                          |
| Candelaria Martinez, Maribel | 2022     | Content validity of a psychological e-health program of self-control and motivation for adults with excess weight                                                   | .                                                                                                         | Oct 2022    | 12(5)          | .         | 10.1111/cob.12530            | 1758-8103                   | Study Type           | .                                          |
| Cheikh-Moussa, Kamila        | 2020     | Improving Engagement Among Patients With Chronic Cardiometabolic Conditions Using mHealth: Critical Review of Reviews                                               | .                                                                                                         | 08 Apr 2020 | 8(4)           | .         | 10.2196/15446                | 2291-5222                   | Study Type           | .                                          |
| Chew, Han Shi Jocelyn        | 2021     | The potential of artificial intelligence in enhancing adult weight loss: a scoping review.                                                                          | Public Health Nutr                                                                                        | Jun 2021    | 24(8)          | 1993-2020 | 10.1017/S1368980021000598    | 1475-2727 1368-9800         | Study Type           | .                                          |

| First author(s)           | Pub year | Title                                                                                                                                                                                            | Publication       | Pub date    | Volume (issue) | Pages     | doi                           | issn and isbn | Reason for exclusion | Notes |
|---------------------------|----------|--------------------------------------------------------------------------------------------------------------------------------------------------------------------------------------------------|-------------------|-------------|----------------|-----------|-------------------------------|---------------|----------------------|-------|
| Eicher-Miller, Heather A. | 2021     | Expanding the Capabilities of Nutrition Research and Health Promotion Through Mobile-Based Applications                                                                                          | .                 | May 2021    | 12(3)          | 1032-1041 | 10.1093/advances/nmab022      | 2161-8313     | Study Type           | .     |
| Encantado, J.             | 2022     | What goes on in digital behaviour change interventions for weight loss maintenance targeting physical activity: A scoping review                                                                 | .                 | 2022        | 8              | .         | 10.1177/20552076221129089     | .             | Study Type           | .     |
| Gamble, Abigail           | 2020     | Effects of eHealth interventions on physical activity and weight among pregnant and postpartum women and the sociodemographic characteristics of study populations: a systematic review protocol | .                 | Nov 2020    | 18(11)         | 2396-2403 | 10.11124/ JBIS RIR-D-19-00378 | 2689-8381     | Study Type           | .     |
| Ghelani, Drishti P.       | 2020     | Mobile Apps for Weight Management: A Review of the Latest Evidence to Inform Practice                                                                                                            | .                 | 24 Jun 2020 | 11             | .         | 10.3389/fendo.2020.00412      | 1664-2392     | Study Type           | .     |
| Gold, Natalie             | 2021     | Effectiveness of Digital Interventions for Reducing Behavioral Risks of Cardiovascular Disease in Nonclinical Adult Populations: Systematic Review of Reviews                                    | .                 | 14 May 2021 | 23(5)          | .         | 10.2196/19688                 | 1438-8871     | Study Type           | .     |
| Hinchliffe, N.            | 2022     | The Potential Role of Digital Health in Obesity Care                                                                                                                                             | .                 | 2022        | 39(10)         | 4397-4412 | 10.1007/s12325-022-02265-4    | .             | Study Type           | .     |
| Hutchesson, Melinda J.    | 2020     | Supporting women of childbearing age in the prevention and treatment of overweight and obesity: a                                                                                                | BMC Womens Health | 23 Jan 2020 | 20(1)          | 14        | 10.1186/s12905-020-0882-3     | 1472-6874     | Study Type           | .     |

| First author(s)        | Pub year | Title                                                                                                                                                            | Publication | Pub date    | Volume (issue) | Pages   | doi                        | issn and isbn          | Reason for exclusion | Notes |
|------------------------|----------|------------------------------------------------------------------------------------------------------------------------------------------------------------------|-------------|-------------|----------------|---------|----------------------------|------------------------|----------------------|-------|
|                        |          | scoping review of randomized control trials of behavioral interventions                                                                                          |             |             |                |         |                            |                        |                      |       |
| Hutchesson, Melinda J. | 2021     | eHealth interventions targeting nutrition, physical activity, sedentary behavior, or obesity in adults: A scoping review of systematic reviews.                  | Obes Rev    | Oct 2021    | 22(10)         | e13295  | 10.1111/obr.13295          | 1467-789X<br>1467-7881 | Study Type           | .     |
| Kim, Meelim            | 2021     | Digital Therapeutics for Obesity and Eating-Related Problems                                                                                                     | .           | Apr 2021    | 36(2)          | 220-228 | 10.3803/EnM.2021.107       | 2093-596X              | Study Type           | .     |
| Marcolino, M.S.        | 2018     | The impact of mHealth interventions: Systematic review of systematic reviews                                                                                     | .           | 2018        | 6(1)           | .       | 10.2196/mhealth.8873       | .                      | Study Type           | .     |
| Myers-Ingram, R.       | 2022     | Outcomes following eHealth Weight Management Interventions in Adults with Overweight and Obesity from Low Socioeconomic Groups: Protocol for a Systematic Review | .           | 2022        | 11(1)          | .       | 10.2196/34546              | .                      | Study Type           | .     |
| Rhee, Sang Youl        | 2020     | Present and Future of Digital Health in Diabetes and Metabolic Disease                                                                                           | .           | Dec 2020    | 44(6)          | 819-827 | 10.4093/dmj.2020.0088      | 2233-6079              | Study Type           | .     |
| Shannon, H.H.          | 2019     | Use of Technology in the Management of Obesity: A Literature Review                                                                                              | .           | 2019        | 16(Fall)       | 1c      | .                          | .                      | Study Type           | .     |
| Ufholz, K.             | 2021     | A Review of Telemedicine Interventions for Weight Loss                                                                                                           | .           | 2021        | 15(9)          | .       | 10.1007/s12170-021-00680-w | .                      | Study Type           | .     |
| Wang, Youfa            | 2020     | Effectiveness of Mobile Health Interventions on Diabetes and Obesity Treatment and Management: Systematic Review of Systematic Reviews                           | .           | 28 Apr 2020 | 8(4)           | .       | 10.2196/15400              | 2291-5222              | Study Type           | .     |



| First author(s) | Pub year | Title                                                                                                                                                    | Publication | Pub date | Volume (issue) | Pages | doi           | issn and isbn | Reason for exclusion | Notes |
|-----------------|----------|----------------------------------------------------------------------------------------------------------------------------------------------------------|-------------|----------|----------------|-------|---------------|---------------|----------------------|-------|
| Yin, Z.         | 2020     | A digital health intervention for weight management for latino families living in rural communities: Perspectives and lessons learned during development | .           | 2020     | 4(8)           | .     | 10.2196/20679 | .             | Study Type           | .     |

**Table S2.** Studies included in each review

| Author(s), publication year  | Ang et al, 2021 | Antoun et al, 2022 | Beleigoli et al, 2019 | Berry & Kassavou et al, 2021 | Berry & Sala et al, 2021 | Besson et al, 2020 | Chew et al, 2022 | Dounavi et al, 2019 | Holmes et al, 2018 | Houser et al, 2019 | Huang et al, 2018 | Islam et al, 2020 | Jahangiry et al, 2021 | Lahtio et al, 2022 | Lau et al, 2020 | LeBlanc et al, 2018 * | Lee et al, 2022 | Mamalaki et al, 2022 | Mata-González et al, 2020 | Novaes et al, 2022 | O'Boyle et al, 2022 | Podina et al, 2018 | Puigdomènech et al, 2019 | Rumbo-Rodríguez et al, 2020 | Shi et al, 2022 | Varela et al, 2021 |
|------------------------------|-----------------|--------------------|-----------------------|------------------------------|--------------------------|--------------------|------------------|---------------------|--------------------|--------------------|-------------------|-------------------|-----------------------|--------------------|-----------------|-----------------------|-----------------|----------------------|---------------------------|--------------------|---------------------|--------------------|--------------------------|-----------------------------|-----------------|--------------------|
| Abdi (2015)                  |                 |                    |                       |                              |                          |                    |                  |                     |                    |                    |                   |                   |                       |                    |                 | x                     |                 |                      |                           |                    |                     | x                  |                          | x                           |                 |                    |
| Adachi (2007)                |                 |                    |                       |                              |                          |                    |                  |                     |                    |                    |                   |                   |                       |                    |                 |                       |                 |                      |                           |                    |                     |                    |                          |                             | x               |                    |
| Aguiar (2016)                |                 |                    |                       |                              |                          |                    |                  |                     |                    |                    |                   |                   |                       | x                  |                 |                       |                 |                      |                           |                    |                     |                    |                          |                             |                 |                    |
| Ahn (2020)                   |                 | x                  |                       |                              |                          |                    |                  |                     |                    |                    |                   |                   |                       |                    |                 |                       |                 |                      |                           |                    |                     |                    |                          |                             |                 |                    |
| Ahrendt (2014)               |                 |                    |                       |                              |                          |                    |                  |                     |                    | x                  |                   |                   |                       |                    |                 |                       |                 |                      |                           |                    |                     |                    |                          |                             |                 |                    |
| Alencar (2019)               |                 |                    |                       |                              |                          |                    |                  |                     |                    |                    |                   |                   |                       |                    |                 |                       |                 |                      |                           |                    | x                   |                    |                          | x                           | x               |                    |
| Allen(2013)                  |                 | x                  | x                     | x                            | x                        |                    |                  | x                   |                    | x                  |                   | x                 |                       |                    |                 |                       |                 |                      |                           |                    |                     | x                  |                          | x                           | x               |                    |
| Allman-Farinelli (2016)      |                 |                    |                       |                              |                          |                    |                  | x                   |                    |                    |                   |                   |                       |                    |                 |                       |                 |                      |                           |                    |                     |                    |                          |                             |                 |                    |
| Almeida (2015)               |                 |                    |                       |                              |                          |                    |                  |                     |                    |                    |                   |                   |                       |                    |                 |                       | x               |                      |                           |                    |                     |                    |                          |                             |                 |                    |
| Anderson (2010)              |                 |                    |                       |                              |                          |                    |                  |                     |                    |                    | x                 |                   |                       | x                  |                 |                       |                 |                      |                           |                    |                     |                    |                          |                             |                 |                    |
| Apiñaniz (2019)              |                 |                    |                       |                              |                          |                    |                  |                     |                    |                    |                   |                   |                       |                    |                 |                       |                 |                      |                           |                    |                     |                    |                          |                             | x               |                    |
| Appel (2011)                 |                 |                    |                       |                              |                          |                    |                  |                     |                    |                    |                   |                   |                       |                    | x               | x                     |                 |                      |                           |                    |                     |                    |                          |                             |                 |                    |
| Archer (2012)                |                 |                    |                       |                              |                          |                    |                  |                     |                    | x                  |                   |                   |                       |                    |                 |                       |                 |                      |                           |                    |                     |                    |                          |                             |                 |                    |
| Aschbrenner & Naslund (2016) |                 |                    |                       |                              |                          |                    |                  |                     |                    |                    |                   |                   |                       |                    |                 |                       |                 |                      |                           |                    |                     |                    |                          |                             |                 |                    |
| Aschbrenner & Naslund (2016) |                 |                    |                       |                              |                          |                    |                  |                     |                    |                    |                   |                   |                       |                    |                 |                       |                 |                      |                           |                    |                     |                    |                          |                             |                 |                    |
| Ashwell (2014)               |                 |                    |                       |                              |                          |                    |                  |                     |                    |                    |                   |                   |                       |                    |                 |                       |                 |                      |                           |                    |                     |                    |                          |                             |                 |                    |
| Axley (2018)                 |                 |                    |                       |                              | x                        |                    |                  |                     |                    |                    |                   |                   |                       |                    |                 |                       |                 |                      |                           |                    |                     |                    |                          |                             |                 |                    |

| Author(s), publication year | Ang et al, 2021 | Antoun et al, 2022 | Beleigoli et al, 2019 | Berry & Kasavou et al, 2021 | Berry & Sala et al, 2021 | Besson et al, 2020 | Chew et al, 2022 | Dounavi et al, 2019 | Holmes et al, 2018 | Houser et al, 2019 | Huang et al, 2018 | Islam et al, 2020 | Jahangiry et al, 2021 | Lahtio et al, 2022 | Lau et al, 2020 | LeBlanc et al, 2018 * | Lee et al, 2022 | Mamalaki et al, 2022 | Mata-González et al, 2020 | Novaes et al, 2022 | O'Boyle et al, 2022 | Podina et al, 2018 | Puigdomènech et al, 2019 | Rumbo-Rodríguez et al, 2020 | Shi et al, 2022 | Varela et al, 2021 |
|-----------------------------|-----------------|--------------------|-----------------------|-----------------------------|--------------------------|--------------------|------------------|---------------------|--------------------|--------------------|-------------------|-------------------|-----------------------|--------------------|-----------------|-----------------------|-----------------|----------------------|---------------------------|--------------------|---------------------|--------------------|--------------------------|-----------------------------|-----------------|--------------------|
| Azar (2015)                 |                 |                    |                       |                             |                          |                    |                  |                     |                    |                    |                   |                   |                       |                    |                 |                       |                 |                      |                           |                    |                     | x                  |                          | x                           | x               |                    |
| Balk-Moller (2017)          |                 |                    |                       |                             |                          |                    |                  |                     |                    |                    |                   |                   |                       |                    |                 |                       | x               |                      |                           |                    |                     |                    |                          |                             |                 |                    |
| Barnes (2014)               |                 |                    |                       |                             |                          |                    |                  |                     |                    |                    |                   |                   |                       |                    |                 |                       |                 |                      |                           |                    |                     |                    |                          |                             | x               |                    |
| Behm-Morawitz (2016)        |                 |                    |                       |                             |                          |                    |                  |                     |                    |                    |                   |                   |                       |                    |                 |                       |                 |                      |                           |                    |                     |                    |                          | x                           |                 |                    |
| Bender (2017)               |                 | x                  |                       |                             |                          |                    |                  |                     |                    |                    |                   |                   |                       |                    |                 |                       |                 |                      |                           |                    |                     |                    |                          |                             | x               |                    |
| Bender (2018)               | x               |                    |                       |                             |                          |                    |                  |                     |                    |                    |                   |                   |                       |                    |                 |                       |                 |                      |                           |                    |                     |                    |                          |                             | x               |                    |
| Bennett & Steinberg (2018)  |                 |                    |                       |                             |                          |                    |                  |                     |                    |                    |                   |                   |                       |                    |                 |                       |                 |                      |                           |                    | x                   |                    |                          |                             |                 |                    |
| Bennett & Warner (2012)     |                 |                    |                       |                             |                          |                    |                  |                     |                    | x                  |                   |                   |                       |                    |                 |                       |                 |                      |                           |                    |                     |                    |                          |                             |                 |                    |
| Bhuyan (2016)               |                 |                    |                       |                             |                          |                    |                  | x                   |                    |                    |                   |                   |                       |                    |                 |                       |                 |                      |                           |                    |                     |                    |                          |                             |                 |                    |
| Binks (2010)                |                 |                    |                       |                             |                          |                    |                  |                     |                    |                    |                   |                   |                       |                    |                 |                       |                 |                      | x                         |                    |                     |                    |                          |                             |                 |                    |
| Block (2015)                |                 |                    |                       |                             |                          |                    |                  |                     |                    |                    |                   |                   |                       |                    |                 |                       |                 |                      |                           |                    |                     |                    | x                        |                             | x               |                    |
| Blomfield (2013)            |                 |                    |                       |                             |                          |                    |                  |                     |                    |                    |                   |                   |                       |                    |                 |                       |                 |                      |                           |                    |                     |                    |                          |                             |                 | x                  |
| Blomfield (2014)            |                 |                    |                       |                             |                          |                    |                  |                     |                    |                    |                   |                   |                       |                    |                 |                       |                 |                      |                           |                    |                     | x                  |                          |                             |                 |                    |
| Bond (2014)                 |                 |                    |                       |                             |                          |                    |                  |                     |                    |                    |                   |                   |                       |                    |                 |                       |                 |                      |                           |                    |                     |                    | x                        |                             |                 |                    |
| Bouhaidar (2013)            |                 |                    |                       |                             | x                        |                    |                  |                     |                    | x                  |                   |                   |                       |                    |                 |                       |                 |                      |                           |                    |                     |                    |                          | x                           |                 |                    |
| Bove (2013)                 |                 |                    |                       |                             |                          |                    |                  |                     |                    |                    | x                 |                   |                       |                    |                 |                       |                 |                      |                           |                    |                     |                    |                          |                             |                 |                    |
| Brindal & Freyne (2012)     |                 |                    |                       |                             |                          |                    |                  |                     |                    |                    |                   |                   |                       |                    |                 |                       |                 |                      |                           |                    |                     | x                  |                          |                             | x               |                    |
| Brindal & Hendrie (2013)    |                 | x                  |                       |                             |                          |                    |                  |                     |                    |                    |                   | x                 |                       |                    |                 |                       |                 |                      |                           |                    |                     | x                  |                          |                             | x               |                    |
| Brindal & Hendrie (2018)    |                 |                    |                       |                             | x                        | x                  |                  |                     |                    |                    |                   |                   |                       |                    |                 |                       |                 |                      |                           |                    |                     |                    |                          |                             |                 |                    |
| Brindal & Hendrie (2019)    |                 |                    |                       |                             |                          |                    |                  |                     |                    |                    |                   |                   |                       |                    |                 |                       |                 | x                    |                           |                    |                     |                    |                          |                             |                 |                    |
| Brown (2014)                |                 |                    |                       |                             |                          |                    |                  |                     |                    |                    |                   |                   |                       |                    |                 |                       |                 |                      |                           | x                  |                     |                    |                          |                             |                 |                    |
| Bujnowska-Fedak (2011)      |                 |                    |                       |                             |                          |                    |                  |                     |                    |                    | x                 |                   |                       |                    |                 |                       |                 |                      |                           |                    |                     |                    |                          |                             |                 |                    |

| Author(s), publication year | Ang et al, 2021 | Antoun et al, 2022 | Beleigoli et al, 2019 | Berry & Kasavou et al, 2021 | Berry & Sala et al, 2021 | Besson et al, 2020 | Chew et al, 2022 | Dounavi et al, 2019 | Holmes et al, 2018 | Houser et al, 2019 | Huang et al, 2018 | Islam et al, 2020 | Jahangiry et al, 2021 | Lahtio et al, 2022 | Lau et al, 2020 | LeBlanc et al, 2018 * | Lee et al, 2022 | Mamalaki et al, 2022 | Mata-González et al, 2020 | Novaes et al, 2022 | O'Boyle et al, 2022 | Podina et al, 2018 | Puigdomènech et al, 2019 | Rumbo-Rodríguez et al, 2020 | Shi et al, 2022 | Varela et al, 2021 |
|-----------------------------|-----------------|--------------------|-----------------------|-----------------------------|--------------------------|--------------------|------------------|---------------------|--------------------|--------------------|-------------------|-------------------|-----------------------|--------------------|-----------------|-----------------------|-----------------|----------------------|---------------------------|--------------------|---------------------|--------------------|--------------------------|-----------------------------|-----------------|--------------------|
| Burke & Conroy (2011)       |                 |                    |                       |                             |                          | x                  |                  |                     |                    |                    |                   |                   |                       |                    |                 |                       |                 |                      |                           |                    |                     |                    |                          |                             | x               |                    |
| Burke & Lee (2012)          |                 |                    |                       |                             |                          |                    |                  |                     |                    |                    | x                 |                   |                       |                    |                 |                       |                 |                      |                           |                    |                     |                    |                          |                             |                 |                    |
| Burke & Styn (2012)         |                 |                    |                       |                             |                          |                    |                  | x                   |                    | x                  |                   |                   |                       |                    |                 |                       |                 |                      |                           |                    |                     |                    |                          | x                           |                 |                    |
| Burke & Zheng (2017)        |                 | x                  |                       |                             |                          |                    |                  |                     |                    |                    |                   |                   |                       |                    |                 |                       |                 |                      |                           |                    |                     |                    |                          |                             |                 |                    |
| Cadmus-Bertram (2016)       |                 |                    |                       | x                           |                          |                    |                  |                     |                    |                    |                   |                   |                       |                    |                 |                       |                 |                      |                           |                    |                     |                    |                          |                             |                 |                    |
| Carnie (2013)               |                 |                    |                       |                             |                          |                    |                  |                     |                    |                    |                   |                   |                       |                    |                 |                       | x               |                      |                           |                    |                     |                    |                          |                             |                 |                    |
| Carpenter (2019)            |                 |                    |                       |                             |                          |                    |                  |                     |                    |                    |                   |                   |                       |                    |                 |                       |                 |                      |                           |                    | x                   |                    |                          |                             |                 |                    |
| Carr (2009)                 |                 |                    |                       |                             |                          |                    |                  |                     |                    |                    |                   |                   | x                     |                    |                 |                       |                 |                      |                           |                    |                     |                    |                          |                             |                 |                    |
| Carroll (2017)              |                 |                    |                       |                             |                          |                    |                  | x                   |                    |                    |                   |                   |                       |                    |                 |                       |                 |                      |                           |                    |                     |                    |                          |                             |                 |                    |
| Carter (2013)               |                 | x                  |                       |                             |                          |                    | x                | x                   |                    |                    |                   | x                 |                       |                    |                 |                       |                 |                      |                           |                    |                     |                    | x                        | x                           | x               |                    |
| Chambliss (2011)            |                 |                    |                       |                             |                          |                    |                  |                     |                    |                    |                   |                   |                       | x                  | x               |                       |                 |                      |                           |                    |                     | x                  |                          | x                           |                 | x                  |
| Chen & Chang (2017)         |                 |                    |                       |                             |                          |                    |                  |                     |                    |                    |                   |                   |                       |                    |                 |                       |                 |                      |                           | x                  |                     |                    |                          |                             |                 |                    |
| Chen & Tsao (2012)          |                 |                    |                       |                             |                          |                    |                  |                     |                    |                    |                   |                   |                       | x                  |                 |                       |                 |                      |                           |                    |                     |                    |                          |                             |                 |                    |
| Cho (2017)                  |                 |                    |                       |                             |                          |                    |                  |                     |                    |                    |                   |                   |                       | x                  |                 |                       |                 |                      |                           |                    |                     |                    |                          |                             |                 |                    |
| Choi (2019)                 |                 | x                  |                       |                             |                          |                    |                  |                     |                    |                    |                   |                   |                       |                    |                 |                       |                 |                      |                           |                    |                     |                    |                          |                             |                 |                    |
| Christian (2011)            |                 |                    |                       |                             |                          |                    |                  |                     |                    |                    |                   |                   |                       |                    |                 |                       | x               |                      |                           |                    |                     |                    |                          |                             |                 |                    |
| Chung (2014)                |                 |                    | x                     |                             |                          |                    |                  |                     |                    |                    |                   |                   |                       |                    |                 |                       |                 |                      |                           |                    | x                   |                    |                          | x                           |                 |                    |
| Collins & Morgan (2012)     |                 |                    | x                     | x                           |                          |                    |                  |                     |                    |                    |                   |                   |                       | x                  | x               |                       |                 |                      | x                         |                    | x                   | x                  |                          |                             |                 | x                  |
| Collins & Morgan (2013)     |                 |                    |                       |                             |                          |                    |                  |                     |                    |                    |                   |                   |                       |                    |                 |                       |                 |                      |                           |                    |                     |                    |                          |                             | x               | x                  |
| Collins & Morgan (2017)     |                 |                    |                       |                             |                          |                    |                  |                     |                    |                    |                   |                   |                       |                    |                 |                       |                 | x                    |                           |                    |                     |                    |                          |                             | x               |                    |
| Crane (2015)                |                 |                    |                       |                             |                          |                    |                  |                     |                    |                    |                   |                   |                       |                    |                 |                       |                 |                      | x                         |                    |                     | x                  |                          |                             | x               |                    |
| Cussler (2008)              |                 |                    |                       |                             |                          |                    |                  |                     | x                  |                    |                   |                   |                       |                    |                 | x                     |                 | x                    |                           |                    |                     |                    |                          |                             |                 |                    |

| Author(s), publication year | Ang et al, 2021 | Antoun et al, 2022 | Beleigoli et al, 2019 | Berry & Kasavou et al, 2021 | Berry & Sala et al, 2021 | Besson et al, 2020 | Chew et al, 2022 | Dounavi et al, 2019 | Holmes et al, 2018 | Houser et al, 2019 | Huang et al, 2018 | Islam et al, 2020 | Jahangiry et al, 2021 | Lahtio et al, 2022 | Lau et al, 2020 | LeBlanc et al, 2018 * | Lee et al, 2022 | Mamalaki et al, 2022 | Mata-González et al, 2020 | Novaes et al, 2022 | O'Boyle et al, 2022 | Podina et al, 2018 | Puigdomènech et al, 2019 | Rumbo-Rodríguez et al, 2020 | Shi et al, 2022 | Varela et al, 2021 |  |
|-----------------------------|-----------------|--------------------|-----------------------|-----------------------------|--------------------------|--------------------|------------------|---------------------|--------------------|--------------------|-------------------|-------------------|-----------------------|--------------------|-----------------|-----------------------|-----------------|----------------------|---------------------------|--------------------|---------------------|--------------------|--------------------------|-----------------------------|-----------------|--------------------|--|
| Damschroder (2014)          |                 |                    |                       |                             |                          |                    |                  |                     |                    |                    |                   |                   |                       |                    |                 |                       |                 |                      |                           |                    |                     | x                  |                          |                             |                 |                    |  |
| Day (2019)                  |                 |                    |                       |                             |                          |                    |                  |                     |                    |                    |                   |                   |                       |                    |                 | x                     |                 |                      |                           |                    |                     |                    |                          |                             |                 |                    |  |
| Dennison (2014)             |                 |                    |                       |                             |                          |                    |                  |                     |                    |                    |                   |                   |                       |                    |                 |                       |                 |                      | x                         |                    |                     |                    |                          |                             | x               |                    |  |
| Devi (2014)                 |                 |                    |                       |                             |                          |                    |                  |                     |                    |                    |                   |                   |                       | x                  |                 |                       |                 |                      |                           |                    |                     |                    |                          |                             |                 |                    |  |
| Digenio (2009)              |                 |                    |                       |                             |                          |                    |                  |                     |                    |                    |                   |                   |                       |                    |                 |                       |                 |                      |                           |                    |                     |                    |                          |                             | x               |                    |  |
| Donaldson (2014)            |                 |                    |                       |                             |                          |                    |                  |                     | x                  |                    |                   |                   |                       |                    |                 |                       |                 |                      |                           |                    | x                   |                    |                          |                             |                 |                    |  |
| Dong (2018)                 | x               |                    |                       |                             |                          |                    |                  |                     |                    |                    |                   |                   |                       |                    |                 |                       |                 |                      |                           |                    |                     |                    |                          |                             |                 |                    |  |
| Dorje 2019                  | x               |                    |                       |                             |                          |                    |                  |                     |                    |                    |                   |                   |                       |                    |                 |                       |                 |                      |                           |                    |                     |                    |                          |                             |                 |                    |  |
| Du (2016)                   |                 |                    |                       |                             |                          |                    |                  | x                   |                    |                    |                   |                   |                       |                    |                 |                       |                 |                      |                           |                    |                     |                    |                          |                             |                 |                    |  |
| Duncan (2020)               |                 | x                  |                       |                             |                          |                    | x                |                     |                    |                    |                   |                   |                       |                    |                 |                       |                 |                      |                           |                    |                     |                    |                          |                             |                 |                    |  |
| Dunn & Olabode-Dada (2016)  |                 |                    | x                     |                             |                          |                    |                  |                     |                    |                    |                   |                   |                       |                    |                 |                       |                 |                      |                           |                    |                     |                    |                          |                             |                 |                    |  |
| Dunn & Turner-McGrievy      |                 |                    |                       |                             |                          |                    | x                |                     |                    |                    |                   |                   |                       |                    |                 |                       |                 |                      |                           |                    |                     |                    |                          |                             |                 |                    |  |
| Dunn & Whetstone (2014)     |                 |                    |                       |                             |                          |                    |                  |                     |                    |                    |                   |                   |                       |                    |                 |                       |                 |                      |                           |                    |                     |                    |                          | x                           |                 |                    |  |
| Eakin (2014)                |                 |                    |                       |                             |                          |                    |                  |                     |                    |                    |                   |                   |                       | x                  |                 |                       |                 |                      |                           |                    |                     |                    |                          |                             |                 |                    |  |
| Eisenhauer (2021)           |                 |                    |                       |                             |                          |                    | x                |                     |                    |                    |                   |                   |                       |                    |                 |                       |                 |                      |                           |                    |                     |                    |                          |                             |                 |                    |  |
| Elbert (2016)               |                 |                    |                       |                             |                          |                    |                  | x                   |                    |                    |                   |                   |                       |                    |                 |                       |                 |                      |                           |                    |                     |                    |                          |                             |                 |                    |  |
| Evangelista (2018)          |                 | x                  |                       |                             |                          |                    |                  |                     |                    |                    |                   |                   |                       |                    |                 |                       |                 |                      |                           |                    |                     |                    |                          |                             |                 |                    |  |
| Faridi (2008)               |                 |                    |                       |                             |                          |                    |                  |                     |                    |                    | x                 |                   |                       |                    |                 |                       |                 |                      |                           |                    |                     |                    |                          |                             |                 |                    |  |
| Farinelli (2016)            |                 |                    |                       |                             |                          |                    |                  |                     |                    |                    |                   | x                 |                       |                    |                 |                       |                 |                      |                           |                    |                     |                    |                          |                             |                 |                    |  |
| Finkelstein (2015)          |                 |                    |                       |                             |                          |                    |                  |                     |                    |                    |                   |                   |                       |                    |                 |                       |                 |                      |                           |                    |                     |                    | x                        |                             |                 |                    |  |
| Fischer (2016)              |                 |                    |                       |                             |                          |                    |                  |                     |                    |                    |                   |                   |                       |                    |                 | x                     |                 |                      |                           |                    |                     |                    |                          |                             |                 |                    |  |
| Fjeldsoe (2016)             |                 |                    |                       |                             |                          |                    |                  |                     | x                  |                    |                   |                   |                       |                    |                 |                       |                 |                      |                           |                    |                     |                    |                          |                             |                 |                    |  |

| Author(s), publication year | Ang et al, 2021 | Antoun et al, 2022 | Beleigoli et al, 2019 | Berry & Kasavou et al, 2021 | Berry & Sala et al, 2021 | Besson et al, 2020 | Chew et al, 2022 | Dounavi et al, 2019 | Holmes et al, 2018 | Houser et al, 2019 | Huang et al, 2018 | Islam et al, 2020 | Jahangiry et al, 2021 | Lahtio et al, 2022 | Lau et al, 2020 | LeBlanc et al, 2018 * | Lee et al, 2022 | Mamalaki et al, 2022 | Mata-González et al, 2020 | Novaes et al, 2022 | O'Boyle et al, 2022 | Podina et al, 2018 | Puigdomènech et al, 2019 | Rumbo-Rodríguez et al, 2020 | Shi et al, 2022 | Varela et al, 2021 |
|-----------------------------|-----------------|--------------------|-----------------------|-----------------------------|--------------------------|--------------------|------------------|---------------------|--------------------|--------------------|-------------------|-------------------|-----------------------|--------------------|-----------------|-----------------------|-----------------|----------------------|---------------------------|--------------------|---------------------|--------------------|--------------------------|-----------------------------|-----------------|--------------------|
| Forman (2014)               |                 |                    |                       |                             |                          |                    | x                |                     |                    |                    |                   |                   |                       |                    |                 |                       |                 |                      |                           |                    |                     |                    |                          |                             |                 |                    |
| Fukuoka (2015)              | x               |                    | x                     |                             |                          |                    |                  |                     |                    |                    |                   |                   |                       |                    |                 |                       |                 |                      |                           |                    |                     | x                  |                          |                             | x               |                    |
| Gabriele (2011)             |                 |                    |                       |                             |                          |                    |                  |                     |                    |                    |                   |                   |                       |                    |                 |                       |                 |                      |                           |                    |                     |                    |                          |                             | x               | x                  |
| Garcia-Ortiz (2018)         |                 |                    |                       |                             |                          |                    |                  |                     |                    |                    |                   |                   |                       |                    |                 |                       |                 |                      |                           |                    |                     |                    |                          |                             |                 |                    |
| Gerber (2013)               |                 |                    |                       |                             |                          |                    |                  |                     |                    | x                  |                   |                   |                       |                    |                 |                       |                 |                      |                           |                    |                     |                    |                          |                             |                 |                    |
| Gilmore (2017)              | x               |                    |                       |                             |                          |                    |                  |                     |                    |                    |                   |                   |                       |                    |                 |                       |                 |                      |                           |                    |                     |                    |                          |                             | x               |                    |
| Glasgow & Kurz (2010)       |                 |                    | x                     |                             |                          |                    |                  |                     |                    |                    |                   |                   |                       |                    |                 |                       |                 |                      |                           |                    |                     |                    |                          |                             |                 |                    |
| Glasgow & Kurz (2012)       |                 |                    |                       |                             |                          |                    |                  |                     |                    |                    | x                 |                   |                       |                    |                 |                       |                 |                      |                           |                    |                     |                    |                          |                             |                 |                    |
| Glynn (2014)                |                 |                    |                       |                             |                          |                    |                  | x                   |                    |                    |                   | x                 |                       |                    |                 |                       |                 |                      |                           |                    |                     |                    |                          |                             |                 |                    |
| Godino & Golaszewski (2019) |                 |                    |                       |                             |                          |                    |                  |                     |                    |                    |                   |                   |                       |                    |                 |                       |                 |                      |                           |                    |                     |                    |                          | x                           |                 |                    |
| Godino & Merchant (2016)    |                 |                    |                       |                             |                          |                    | x                |                     |                    |                    |                   |                   |                       |                    |                 | x                     |                 |                      |                           |                    |                     | x                  |                          | x                           |                 |                    |
| Gokee (2012)                |                 |                    |                       |                             |                          |                    |                  |                     |                    |                    |                   |                   |                       |                    |                 |                       |                 |                      | x                         |                    |                     |                    |                          |                             |                 |                    |
| Gold (2007)                 |                 |                    |                       |                             | x                        |                    |                  |                     |                    |                    |                   |                   |                       |                    |                 |                       |                 |                      |                           |                    |                     |                    |                          |                             | x               | x                  |
| Gomez-Marcos (2017)         |                 |                    |                       |                             |                          |                    |                  |                     |                    |                    |                   |                   |                       |                    |                 |                       |                 |                      |                           |                    |                     | x                  |                          |                             |                 |                    |
| Goulis (2004)               |                 |                    |                       | x                           |                          |                    |                  |                     |                    |                    |                   |                   |                       |                    |                 |                       |                 |                      |                           |                    |                     |                    |                          |                             |                 |                    |
| Green (2015)                |                 |                    |                       |                             |                          |                    |                  |                     |                    |                    |                   |                   |                       |                    |                 |                       |                 |                      |                           | x                  |                     |                    |                          |                             |                 |                    |
| Gregoski (2016)             |                 |                    |                       |                             |                          |                    |                  |                     |                    | x                  |                   |                   |                       |                    |                 |                       |                 |                      |                           |                    |                     |                    |                          |                             |                 |                    |
| Gyllensten (2017)           |                 |                    |                       |                             |                          |                    |                  |                     |                    |                    |                   |                   |                       |                    |                 |                       |                 |                      |                           | x                  |                     |                    |                          |                             |                 |                    |
| Haapala (2009)              |                 |                    |                       |                             | x                        |                    |                  |                     |                    |                    |                   |                   |                       | x                  |                 | x                     |                 |                      |                           |                    |                     | x                  |                          | x                           |                 |                    |
| Haddock (2014)              |                 |                    |                       |                             |                          |                    |                  |                     |                    |                    |                   |                   |                       |                    |                 |                       |                 |                      |                           |                    |                     | x                  |                          |                             |                 |                    |
| Hageman (2014)              |                 |                    |                       |                             |                          |                    |                  |                     |                    |                    |                   |                   |                       | x                  |                 |                       |                 |                      |                           |                    |                     |                    |                          |                             |                 |                    |
| Hales (2016)                | x               |                    |                       |                             | x                        |                    |                  |                     |                    |                    |                   |                   |                       |                    |                 |                       |                 |                      |                           |                    |                     |                    |                          |                             |                 |                    |

| Author(s), publication year     | Ang et al, 2021 | Antoun et al, 2022 | Beleigoli et al, 2019 | Berry & Kasavou et al, 2021 | Berry & Sala et al, 2021 | Besson et al, 2020 | Chew et al, 2022 | Dounavi et al, 2019 | Holmes et al, 2018 | Houser et al, 2019 | Huang et al, 2018 | Islam et al, 2020 | Jahangiry et al, 2021 | Lahtio et al, 2022 | Lau et al, 2020 | LeBlanc et al, 2018 * | Lee et al, 2022 | Mamalaki et al, 2022 | Mata-González et al, 2020 | Novaes et al, 2022 | O'Boyle et al, 2022 | Podina et al, 2018 | Puigdomènech et al, 2019 | Rumbo-Rodríguez et al, 2020 | Shi et al, 2022 | Varela et al, 2021 |   |
|---------------------------------|-----------------|--------------------|-----------------------|-----------------------------|--------------------------|--------------------|------------------|---------------------|--------------------|--------------------|-------------------|-------------------|-----------------------|--------------------|-----------------|-----------------------|-----------------|----------------------|---------------------------|--------------------|---------------------|--------------------|--------------------------|-----------------------------|-----------------|--------------------|---|
| Hansen (2012)                   |                 |                    |                       |                             |                          |                    |                  |                     |                    |                    |                   |                   |                       | x                  |                 |                       |                 |                      |                           |                    |                     |                    |                          |                             |                 |                    |   |
| Harno (2006)                    |                 |                    |                       |                             |                          |                    |                  |                     |                    |                    |                   |                   |                       |                    |                 |                       |                 |                      |                           |                    |                     |                    |                          |                             |                 |                    |   |
| Harrigan (2016)                 |                 |                    |                       |                             |                          |                    |                  |                     |                    |                    |                   |                   |                       | x                  |                 |                       |                 |                      |                           |                    |                     |                    |                          |                             |                 |                    |   |
| Hartman (2016)                  |                 | x                  |                       | x                           |                          |                    |                  |                     |                    |                    |                   |                   |                       |                    |                 |                       |                 |                      |                           |                    |                     |                    |                          |                             |                 |                    |   |
| Hartzler (2016)                 |                 |                    |                       |                             |                          |                    |                  | x                   |                    |                    |                   |                   |                       |                    |                 |                       |                 |                      |                           |                    |                     |                    |                          |                             |                 |                    |   |
| Harvey-Berino & Pintauro (2004) |                 |                    |                       |                             |                          |                    |                  |                     |                    |                    |                   |                   |                       |                    |                 |                       |                 | x                    |                           |                    |                     |                    |                          |                             |                 |                    |   |
| Harvey-Berino & Pintauro (2002) |                 |                    |                       |                             |                          |                    |                  |                     |                    |                    |                   |                   |                       |                    |                 |                       |                 | x                    |                           |                    |                     |                    |                          |                             |                 |                    |   |
| Harvey-Berino & West (2010)     |                 |                    |                       |                             |                          | x                  |                  |                     |                    |                    |                   |                   |                       |                    |                 |                       |                 |                      |                           |                    | x                   |                    |                          |                             | x               |                    |   |
| Haufe (2019)                    |                 | x                  |                       |                             |                          |                    |                  |                     |                    |                    |                   |                   |                       |                    |                 |                       |                 |                      |                           |                    |                     |                    |                          |                             |                 |                    |   |
| He (2017)                       |                 |                    |                       |                             |                          |                    |                  |                     |                    |                    |                   |                   |                       |                    |                 |                       |                 |                      |                           |                    |                     |                    | x                        | x                           |                 |                    |   |
| Hebden (2014)                   |                 |                    |                       |                             |                          |                    |                  | x                   |                    |                    |                   | x                 |                       |                    |                 |                       |                 |                      |                           |                    |                     |                    |                          |                             |                 |                    |   |
| Hepdurgun (2020)                |                 |                    |                       |                             |                          |                    |                  |                     |                    |                    |                   |                   |                       |                    |                 |                       |                 |                      |                           |                    |                     |                    |                          |                             |                 | x                  |   |
| Hernández-Reyes (2020)          |                 |                    |                       |                             | x                        |                    |                  |                     |                    |                    |                   |                   |                       |                    |                 |                       |                 |                      |                           |                    |                     |                    |                          | x                           |                 |                    |   |
| Holbrook (2009)                 |                 |                    |                       |                             |                          |                    |                  |                     |                    |                    | x                 |                   |                       |                    |                 |                       |                 |                      |                           |                    |                     |                    |                          |                             |                 |                    |   |
| Holt (2019)                     |                 |                    |                       |                             |                          |                    |                  |                     |                    |                    |                   |                   |                       |                    |                 |                       |                 |                      |                           | x                  |                     |                    |                          |                             |                 |                    |   |
| Huber (2015)                    |                 |                    |                       |                             |                          |                    |                  |                     |                    |                    |                   |                   |                       | x                  |                 |                       |                 |                      |                           |                    |                     |                    |                          |                             |                 |                    |   |
| Hunter (2008)                   |                 |                    |                       |                             |                          |                    |                  |                     |                    |                    |                   |                   |                       | x                  | x               |                       |                 |                      |                           |                    |                     | x                  |                          |                             |                 |                    | x |
| Hurkmans (2018)                 |                 |                    | x                     |                             |                          | x                  |                  |                     |                    |                    |                   |                   |                       |                    |                 |                       |                 |                      |                           |                    |                     |                    | x                        |                             |                 |                    |   |
| Hurling (2007)                  |                 |                    |                       |                             |                          |                    |                  |                     |                    |                    | x                 |                   |                       |                    |                 |                       |                 |                      |                           |                    |                     |                    |                          |                             |                 |                    |   |
| Hutchesson & Callister (2018)   |                 |                    |                       | x                           |                          |                    |                  |                     |                    |                    |                   |                   |                       |                    |                 |                       |                 |                      |                           |                    |                     |                    |                          |                             |                 |                    |   |
| Hutchesson & Collins (2013)     |                 |                    |                       |                             |                          |                    |                  |                     |                    |                    |                   |                   |                       |                    |                 |                       |                 |                      | x                         |                    |                     |                    |                          |                             |                 |                    |   |
| Hutchesson & Collins (2014)     |                 |                    |                       |                             |                          |                    |                  |                     |                    |                    |                   |                   | x                     |                    |                 |                       |                 |                      |                           |                    |                     | x                  |                          |                             |                 |                    |   |

| Author(s), publication year | Ang et al, 2021 | Antoun et al, 2022 | Beleigoli et al, 2019 | Berry & Kasavou et al, 2021 | Berry & Sala et al, 2021 | Besson et al, 2020 | Chew et al, 2022 | Dounavi et al, 2019 | Holmes et al, 2018 | Houser et al, 2019 | Huang et al, 2018 | Islam et al, 2020 | Jahangiry et al, 2021 | Lahtio et al, 2022 | Lau et al, 2020 | LeBlanc et al, 2018 * | Lee et al, 2022 | Mamalaki et al, 2022 | Mata-González et al, 2020 | Novaes et al, 2022 | O'Boyle et al, 2022 | Podina et al, 2018 | Puigdomènech et al, 2019 | Rumbo-Rodríguez et al, 2020 | Shi et al, 2022 | Varela et al, 2021 |
|-----------------------------|-----------------|--------------------|-----------------------|-----------------------------|--------------------------|--------------------|------------------|---------------------|--------------------|--------------------|-------------------|-------------------|-----------------------|--------------------|-----------------|-----------------------|-----------------|----------------------|---------------------------|--------------------|---------------------|--------------------|--------------------------|-----------------------------|-----------------|--------------------|
| Hutchesson & Morgan (2016)  |                 |                    |                       |                             |                          |                    |                  |                     |                    |                    |                   |                   |                       |                    |                 |                       |                 |                      | x                         |                    |                     |                    | x                        |                             |                 |                    |
| Hutchesson & Yin (2016)     |                 |                    |                       |                             |                          |                    |                  |                     |                    |                    |                   |                   |                       |                    |                 |                       |                 |                      | x                         |                    |                     |                    |                          |                             |                 |                    |
| Hwang (2013)                |                 |                    |                       |                             |                          |                    |                  |                     |                    |                    |                   |                   |                       |                    |                 |                       |                 |                      | x                         |                    |                     |                    |                          |                             |                 |                    |
| Ing (2018)                  |                 |                    |                       |                             |                          |                    |                  |                     |                    |                    |                   |                   |                       |                    |                 |                       |                 |                      |                           |                    |                     |                    |                          | x                           |                 |                    |
| Izquierdo (2010)            |                 |                    |                       |                             |                          |                    |                  |                     |                    |                    | x                 |                   |                       |                    |                 |                       |                 |                      |                           |                    |                     |                    |                          |                             |                 |                    |
| Jakicic (2016)              |                 |                    |                       |                             | x                        |                    |                  |                     |                    |                    |                   |                   |                       |                    |                 |                       |                 |                      |                           |                    |                     |                    |                          | x                           | x               |                    |
| Jane (2017)                 |                 |                    |                       |                             |                          |                    |                  |                     |                    |                    |                   |                   |                       |                    |                 |                       |                 |                      |                           |                    |                     |                    |                          |                             | x               |                    |
| Jarab (2012)                |                 |                    |                       |                             |                          |                    |                  |                     |                    |                    | x                 |                   |                       |                    |                 |                       |                 |                      |                           |                    |                     |                    |                          |                             |                 |                    |
| Jebb (2011)                 |                 |                    |                       |                             |                          |                    |                  |                     |                    |                    |                   |                   |                       |                    |                 |                       |                 |                      |                           |                    |                     |                    |                          |                             |                 |                    |
| Jeffrey (2003)              |                 |                    |                       |                             |                          |                    |                  |                     |                    |                    |                   |                   |                       |                    |                 |                       |                 |                      |                           |                    |                     | x                  |                          |                             |                 |                    |
| Jensen (2016)               |                 |                    |                       |                             |                          |                    |                  |                     |                    |                    |                   |                   |                       |                    |                 |                       |                 |                      |                           |                    |                     |                    | x                        |                             |                 |                    |
| Johnston & Massey (2012)    |                 |                    |                       |                             |                          |                    |                  |                     |                    | x                  |                   |                   |                       |                    |                 |                       |                 |                      |                           |                    |                     | x                  |                          | x                           |                 |                    |
| Johnston & Rost (2013)      |                 |                    |                       |                             |                          |                    | x                |                     |                    |                    |                   |                   |                       |                    |                 |                       |                 |                      | x                         |                    | x                   |                    |                          |                             |                 |                    |
| Joseph (2016)               |                 |                    |                       |                             |                          |                    |                  |                     |                    | x                  |                   |                   |                       |                    |                 |                       |                 |                      |                           |                    |                     |                    |                          |                             |                 |                    |
| Jospe (2017)                |                 | x                  |                       |                             |                          |                    |                  |                     |                    |                    |                   |                   |                       |                    |                 |                       |                 |                      |                           |                    |                     |                    |                          |                             |                 |                    |
| Karhula (2015)              |                 |                    |                       |                             |                          |                    |                  |                     |                    |                    |                   |                   |                       | x                  |                 |                       |                 |                      |                           |                    |                     |                    |                          |                             |                 |                    |
| Kaur (2020)                 | x               |                    |                       |                             |                          |                    |                  |                     |                    |                    |                   |                   |                       |                    |                 |                       |                 |                      |                           |                    |                     |                    |                          |                             |                 |                    |
| Keating (2019)              |                 |                    |                       |                             |                          |                    |                  |                     |                    |                    |                   |                   |                       |                    |                 |                       |                 |                      |                           |                    | x                   |                    |                          |                             |                 |                    |
| Kempf & Röhling (2018)      |                 |                    |                       |                             |                          |                    |                  |                     |                    |                    |                   |                   |                       |                    |                 |                       |                 |                      |                           |                    | x                   |                    |                          |                             |                 |                    |
| Kempf & Röhling (2019)      |                 |                    |                       |                             |                          |                    |                  |                     |                    |                    |                   |                   |                       |                    |                 |                       | x               |                      |                           |                    |                     |                    |                          |                             |                 |                    |
| Kerr (2016)                 |                 |                    |                       |                             |                          |                    |                  |                     |                    |                    |                   |                   |                       |                    | x               |                       |                 |                      |                           |                    |                     |                    |                          |                             |                 |                    |
| Kim & Faw (2017)            |                 |                    |                       |                             |                          |                    |                  | x                   |                    | x                  |                   |                   |                       |                    |                 |                       |                 |                      |                           |                    |                     |                    |                          |                             |                 |                    |



| Author(s), publication year  | Ang et al, 2021 | Antoun et al, 2022 | Beleigoli et al, 2019 | Berry & Kasavou et al, 2021 | Berry & Sala et al, 2021 | Besson et al, 2020 | Chew et al, 2022 | Dounavi et al, 2019 | Holmes et al, 2018 | Houser et al, 2019 | Huang et al, 2018 | Islam et al, 2020 | Jahangiry et al, 2021 | Lahtio et al, 2022 | Lau et al, 2020 | LeBlanc et al, 2018 * | Lee et al, 2022 | Mamalaki et al, 2022 | Mata-González et al, 2020 | Novaes et al, 2022 | O'Boyle et al, 2022 | Podina et al, 2018 | Puigdomènech et al, 2019 | Rumbo-Rodríguez et al, 2020 | Shi et al, 2022 | Varela et al, 2021 |  |
|------------------------------|-----------------|--------------------|-----------------------|-----------------------------|--------------------------|--------------------|------------------|---------------------|--------------------|--------------------|-------------------|-------------------|-----------------------|--------------------|-----------------|-----------------------|-----------------|----------------------|---------------------------|--------------------|---------------------|--------------------|--------------------------|-----------------------------|-----------------|--------------------|--|
| Kim & Kwak 2019              | x               |                    |                       |                             |                          |                    |                  |                     |                    |                    |                   |                   |                       |                    |                 |                       |                 |                      |                           |                    |                     |                    |                          |                             |                 |                    |  |
| Kim & Oh (2015)              |                 |                    |                       | x                           |                          |                    |                  |                     |                    |                    |                   |                   |                       |                    |                 |                       |                 |                      |                           |                    | x                   |                    |                          |                             |                 |                    |  |
| Kim & Pike (2010)            |                 |                    |                       |                             |                          |                    |                  |                     |                    | x                  |                   |                   |                       |                    |                 |                       |                 |                      |                           |                    |                     |                    |                          |                             |                 |                    |  |
| Kirwan & Duncan (2012)       |                 |                    |                       |                             |                          |                    |                  | x                   |                    |                    |                   |                   |                       |                    |                 |                       |                 |                      |                           |                    |                     |                    |                          |                             |                 |                    |  |
| Kirwan & Vandelanotte (2013) |                 |                    |                       |                             |                          |                    |                  | x                   |                    |                    |                   |                   |                       |                    |                 |                       |                 |                      |                           |                    |                     |                    |                          |                             |                 |                    |  |
| Kiselev (2012)               |                 |                    |                       |                             |                          |                    |                  | x                   |                    |                    |                   |                   |                       |                    |                 |                       |                 |                      |                           |                    |                     |                    |                          |                             |                 |                    |  |
| Kliemann (2019)              |                 |                    |                       |                             |                          |                    |                  |                     |                    |                    |                   |                   |                       |                    |                 |                       |                 |                      |                           |                    |                     |                    |                          |                             | x               |                    |  |
| Kraschnewski (2011)          |                 |                    | x                     |                             |                          |                    |                  |                     |                    |                    |                   |                   |                       | x                  |                 |                       |                 |                      |                           |                    | x                   |                    |                          |                             |                 |                    |  |
| Krukowski (2011)             |                 |                    | x                     |                             |                          |                    |                  |                     |                    |                    |                   |                   |                       |                    |                 |                       |                 |                      |                           |                    | x                   |                    |                          |                             |                 |                    |  |
| Krukowsky (2013)             |                 |                    |                       |                             |                          |                    |                  |                     |                    |                    |                   |                   |                       |                    |                 |                       |                 | x                    |                           |                    |                     |                    |                          |                             |                 |                    |  |
| Kurtzman (2018)              |                 | x                  |                       |                             |                          |                    | x                |                     |                    |                    |                   |                   |                       |                    |                 |                       |                 |                      |                           |                    |                     |                    |                          |                             |                 |                    |  |
| Laing (2014)                 |                 | x                  |                       |                             |                          |                    |                  | x                   |                    |                    |                   | x                 |                       |                    |                 |                       |                 |                      |                           |                    |                     |                    |                          | x                           |                 |                    |  |
| Leahey (2014)                |                 |                    |                       |                             |                          |                    |                  |                     |                    |                    |                   |                   |                       |                    |                 |                       |                 |                      |                           |                    |                     | x                  |                          |                             |                 |                    |  |
| Lee & Chae (2010)            |                 |                    |                       |                             | x                        |                    |                  |                     |                    |                    |                   | x                 |                       |                    |                 |                       |                 |                      |                           |                    |                     |                    | x                        | x                           |                 |                    |  |
| Lee & Cheung 2018            | x               |                    |                       |                             |                          |                    |                  |                     |                    |                    |                   |                   |                       |                    |                 |                       |                 |                      |                           |                    |                     |                    |                          |                             |                 |                    |  |
| Lee & Kane (2014)            |                 |                    |                       |                             |                          |                    |                  |                     |                    |                    |                   |                   |                       |                    |                 |                       |                 |                      | x                         |                    |                     |                    |                          |                             |                 |                    |  |
| Lee & Kim (2016)             |                 |                    |                       |                             |                          |                    |                  |                     |                    |                    |                   |                   |                       |                    |                 |                       |                 |                      |                           |                    |                     |                    | x                        |                             |                 |                    |  |
| Lee & Kim (2019)             | x               |                    |                       |                             |                          |                    |                  |                     |                    |                    |                   |                   |                       |                    |                 |                       |                 |                      |                           |                    |                     |                    |                          |                             |                 |                    |  |
| Lee & Shim (2019)            |                 | x                  |                       |                             |                          |                    |                  |                     |                    |                    |                   |                   |                       |                    |                 |                       |                 |                      |                           |                    |                     |                    |                          |                             |                 |                    |  |
| Lewis (2019)                 |                 |                    |                       |                             |                          |                    |                  |                     |                    |                    |                   |                   |                       |                    |                 |                       |                 |                      |                           |                    |                     |                    |                          |                             | x               |                    |  |
| Ligibel (2012)               |                 |                    |                       |                             |                          |                    |                  |                     |                    |                    |                   |                   |                       | x                  |                 |                       |                 |                      |                           |                    |                     |                    |                          |                             |                 |                    |  |
| Lim & Johal 2020             | x               |                    |                       |                             |                          |                    |                  |                     |                    |                    |                   |                   |                       |                    |                 |                       |                 |                      |                           |                    |                     |                    |                          |                             |                 |                    |  |

| Author(s), publication year | Ang et al, 2021 | Antoun et al, 2022 | Beleigoli et al, 2019 | Berry & Kasavou et al, 2021 | Berry & Sala et al, 2021 | Besson et al, 2020 | Chew et al, 2022 | Dounavi et al, 2019 | Holmes et al, 2018 | Houser et al, 2019 | Huang et al, 2018 | Islam et al, 2020 | Jahangiry et al, 2021 | Lahtio et al, 2022 | Lau et al, 2020 | LeBlanc et al, 2018 * | Lee et al, 2022 | Mamalaki et al, 2022 | Mata-González et al, 2020 | Novaes et al, 2022 | O'Boyle et al, 2022 | Podina et al, 2018 | Puigdomènech et al, 2019 | Rumbo-Rodríguez et al, 2020 | Shi et al, 2022 | Varela et al, 2021 |  |
|-----------------------------|-----------------|--------------------|-----------------------|-----------------------------|--------------------------|--------------------|------------------|---------------------|--------------------|--------------------|-------------------|-------------------|-----------------------|--------------------|-----------------|-----------------------|-----------------|----------------------|---------------------------|--------------------|---------------------|--------------------|--------------------------|-----------------------------|-----------------|--------------------|--|
| Lim & Kang (2011)           |                 |                    |                       |                             |                          |                    |                  |                     |                    |                    | x                 |                   |                       |                    |                 |                       |                 |                      |                           |                    |                     |                    |                          |                             |                 |                    |  |
| Lim & Ong (2021)            |                 | x                  |                       |                             |                          |                    |                  |                     |                    |                    |                   |                   |                       |                    |                 |                       |                 |                      |                           |                    |                     |                    |                          |                             |                 |                    |  |
| Lin & Grambov (2018)        |                 |                    |                       |                             |                          | x                  |                  |                     |                    |                    |                   |                   |                       |                    |                 |                       |                 |                      |                           |                    |                     |                    |                          |                             |                 |                    |  |
| Lin & Mahmooth (2015)       |                 |                    |                       | x                           |                          |                    |                  |                     |                    |                    |                   |                   |                       |                    |                 |                       |                 |                      |                           |                    |                     |                    |                          |                             |                 |                    |  |
| Lin & Wang (2014)           |                 |                    |                       |                             |                          |                    |                  |                     |                    |                    |                   |                   |                       |                    |                 |                       |                 |                      |                           |                    |                     |                    |                          | x                           |                 |                    |  |
| Lisón (2020)                |                 |                    |                       |                             |                          |                    |                  |                     |                    |                    |                   |                   |                       |                    |                 |                       |                 |                      |                           |                    |                     |                    |                          |                             | x               |                    |  |
| Little (2016)               |                 |                    |                       |                             |                          |                    |                  |                     |                    |                    |                   |                   |                       |                    |                 | x                     |                 |                      |                           |                    |                     |                    |                          |                             |                 |                    |  |
| Logan (2012)                |                 |                    |                       |                             |                          |                    |                  | x                   |                    |                    |                   |                   |                       |                    |                 |                       |                 |                      |                           |                    |                     |                    |                          |                             |                 |                    |  |
| Longin (2012)               |                 |                    |                       |                             |                          |                    |                  |                     |                    |                    |                   |                   |                       |                    |                 |                       |                 |                      | x                         |                    |                     |                    |                          |                             |                 |                    |  |
| Looijmans (2019)            |                 |                    |                       |                             |                          |                    |                  |                     |                    |                    |                   |                   |                       |                    |                 |                       |                 |                      |                           | x                  |                     |                    |                          |                             |                 |                    |  |
| Lugones-Sanchez (2020)      |                 | x                  |                       |                             |                          |                    |                  |                     |                    |                    |                   |                   |                       |                    |                 |                       |                 |                      |                           |                    |                     |                    |                          |                             |                 |                    |  |
| Luley & Blaik (2011)        |                 |                    |                       |                             |                          |                    |                  |                     |                    |                    | x                 |                   |                       |                    |                 |                       |                 |                      |                           |                    |                     |                    |                          |                             |                 |                    |  |
| Luley & Blaik (2014)        |                 |                    |                       |                             |                          |                    |                  |                     |                    |                    |                   |                   |                       |                    |                 | x                     |                 |                      |                           |                    |                     |                    |                          |                             |                 |                    |  |
| Ma (2013)                   |                 |                    |                       |                             |                          |                    |                  |                     |                    |                    |                   |                   |                       |                    |                 | x                     |                 |                      |                           |                    |                     |                    |                          |                             |                 |                    |  |
| Manzoni (2016)              |                 |                    |                       |                             |                          |                    |                  |                     |                    |                    |                   |                   |                       |                    |                 |                       |                 |                      |                           |                    |                     |                    |                          | x                           |                 |                    |  |
| Mao (2017)                  |                 |                    |                       |                             |                          |                    |                  |                     |                    |                    |                   |                   |                       |                    |                 |                       |                 |                      |                           |                    |                     |                    | x                        |                             |                 |                    |  |
| Margolis (2013)             |                 |                    |                       |                             |                          |                    |                  |                     |                    |                    | x                 |                   |                       |                    |                 |                       |                 |                      |                           |                    |                     |                    |                          |                             |                 |                    |  |
| Martin (2015)               |                 |                    |                       |                             |                          |                    | x                |                     |                    |                    |                   |                   |                       | x                  |                 |                       |                 |                      |                           |                    |                     | x                  | x                        | x                           |                 |                    |  |
| Mason (2018)                |                 |                    |                       |                             |                          |                    |                  | x                   |                    |                    |                   |                   |                       |                    |                 |                       |                 |                      |                           |                    |                     |                    |                          |                             |                 |                    |  |
| Matthews (2006)             |                 |                    |                       |                             |                          |                    |                  |                     |                    |                    |                   |                   |                       | x                  |                 |                       |                 |                      |                           |                    |                     |                    |                          |                             |                 |                    |  |
| Mattila (2013)              |                 |                    |                       |                             |                          |                    |                  | x                   |                    |                    |                   |                   |                       |                    |                 |                       |                 |                      |                           |                    |                     |                    |                          |                             |                 |                    |  |
| McCarroll (2015)            |                 |                    |                       |                             |                          |                    |                  |                     |                    |                    |                   |                   |                       |                    |                 |                       |                 |                      |                           |                    |                     |                    | x                        |                             |                 |                    |  |

| Author(s), publication year | Ang et al, 2021 | Antoun et al, 2022 | Beleigoli et al, 2019 | Berry & Kasavou et al, 2021 | Berry & Sala et al, 2021 | Besson et al, 2020 | Chew et al, 2022 | Dounavi et al, 2019 | Holmes et al, 2018 | Houser et al, 2019 | Huang et al, 2018 | Islam et al, 2020 | Jahangiry et al, 2021 | Lahtio et al, 2022 | Lau et al, 2020 | LeBlanc et al, 2018 * | Lee et al, 2022 | Mamalaki et al, 2022 | Mata-González et al, 2020 | Novaes et al, 2022 | O'Boyle et al, 2022 | Podina et al, 2018 | Puigdomènech et al, 2019 | Rumbo-Rodríguez et al, 2020 | Shi et al, 2022 | Varela et al, 2021 |   |
|-----------------------------|-----------------|--------------------|-----------------------|-----------------------------|--------------------------|--------------------|------------------|---------------------|--------------------|--------------------|-------------------|-------------------|-----------------------|--------------------|-----------------|-----------------------|-----------------|----------------------|---------------------------|--------------------|---------------------|--------------------|--------------------------|-----------------------------|-----------------|--------------------|---|
| McConnon (2007)             |                 |                    | x                     |                             |                          |                    |                  |                     |                    |                    |                   |                   |                       |                    |                 |                       |                 |                      |                           |                    |                     |                    |                          |                             |                 | x                  |   |
| McDoniel (2010)             |                 |                    |                       |                             |                          |                    |                  |                     |                    |                    |                   |                   | x                     |                    |                 |                       |                 |                      |                           |                    |                     |                    |                          |                             |                 | x                  |   |
| McGrievy (2011)             |                 |                    |                       |                             |                          |                    |                  |                     |                    |                    |                   | x                 |                       |                    |                 |                       |                 |                      |                           |                    |                     |                    |                          |                             |                 |                    |   |
| McKibbin (2010)             |                 |                    |                       |                             |                          |                    |                  |                     |                    |                    |                   |                   |                       |                    |                 |                       |                 |                      |                           | x                  |                     |                    |                          |                             |                 |                    |   |
| McKinstry (2013)            |                 |                    |                       |                             |                          |                    |                  |                     |                    |                    | x                 |                   |                       |                    |                 |                       |                 |                      |                           |                    |                     |                    |                          |                             |                 |                    |   |
| McTigue (2009)              |                 |                    |                       |                             |                          |                    |                  |                     |                    |                    |                   |                   |                       |                    |                 |                       |                 |                      | x                         |                    |                     |                    |                          |                             |                 |                    |   |
| Mehring (2013)              |                 |                    |                       |                             |                          |                    |                  |                     |                    |                    |                   |                   | x                     | x                  |                 |                       |                 |                      |                           |                    | x                   | x                  |                          |                             |                 |                    |   |
| Melchart (2017)             |                 |                    |                       |                             |                          |                    |                  |                     |                    |                    |                   |                   |                       | x                  |                 |                       |                 |                      |                           |                    |                     |                    |                          |                             |                 |                    |   |
| Micco (2007)                |                 |                    |                       |                             |                          |                    |                  |                     |                    |                    |                   |                   |                       |                    |                 |                       |                 |                      |                           |                    |                     |                    |                          |                             |                 | x                  |   |
| Michaelides (2016)          |                 |                    |                       |                             |                          |                    |                  |                     |                    |                    |                   |                   |                       |                    |                 |                       |                 |                      |                           |                    |                     |                    | x                        |                             |                 |                    |   |
| Monroe (2019)               |                 | x                  |                       |                             |                          |                    |                  |                     |                    |                    |                   |                   |                       |                    |                 |                       |                 |                      |                           |                    |                     |                    |                          |                             |                 |                    |   |
| Morey (2009)                |                 |                    |                       |                             |                          |                    |                  |                     |                    |                    | x                 |                   |                       |                    |                 |                       |                 |                      |                           |                    |                     |                    |                          |                             |                 |                    |   |
| Morgan & Callister (2013)   |                 |                    |                       |                             |                          |                    |                  |                     |                    |                    |                   |                   |                       |                    |                 |                       |                 |                      |                           |                    |                     | x                  |                          |                             | x               | x                  |   |
| Morgan & Collins (2011)     |                 |                    |                       |                             |                          |                    |                  |                     |                    |                    |                   |                   |                       |                    | x               |                       |                 |                      | x                         |                    |                     |                    |                          |                             |                 | x                  |   |
| Morgan & Lubans (2009)      |                 |                    |                       |                             |                          |                    |                  |                     |                    |                    |                   |                   |                       |                    |                 |                       |                 |                      | x                         |                    |                     | x                  |                          |                             | x               | x                  |   |
| Morgan & Lubans (2009)      |                 |                    |                       | x                           |                          |                    |                  |                     |                    |                    |                   |                   |                       |                    |                 |                       |                 |                      |                           |                    |                     |                    |                          |                             |                 |                    |   |
| Morgan & Lubans (2010)      |                 |                    |                       |                             |                          |                    |                  |                     |                    |                    |                   |                   |                       |                    |                 |                       |                 |                      |                           |                    |                     |                    |                          |                             |                 |                    | x |
| Morgan & Lubans (2011)      |                 |                    |                       |                             |                          |                    |                  |                     |                    |                    |                   |                   |                       |                    | x               | x                     |                 |                      |                           |                    |                     |                    |                          | x                           |                 |                    |   |
| Morgan & Scott (2012)       |                 |                    |                       |                             |                          |                    |                  |                     |                    |                    |                   |                   |                       | x                  |                 |                       |                 |                      |                           |                    |                     |                    |                          |                             |                 |                    |   |
| Morgan & Scott (2014)       |                 |                    |                       |                             |                          |                    |                  |                     |                    |                    |                   |                   |                       |                    |                 |                       |                 |                      | x                         |                    |                     |                    |                          | x                           |                 |                    |   |
| Morrison (2014)             |                 |                    |                       |                             |                          |                    |                  | x                   |                    |                    |                   |                   |                       |                    |                 |                       |                 |                      |                           |                    |                     |                    |                          |                             |                 |                    |   |
| Mummah (2017)               |                 |                    |                       |                             |                          |                    |                  |                     |                    |                    |                   |                   |                       |                    |                 |                       |                 |                      |                           |                    |                     |                    | x                        |                             |                 |                    |   |

| Author(s), publication year  | Ang et al, 2021 | Antoun et al, 2022 | Beleigoli et al, 2019 | Berry & Kasavou et al, 2021 | Berry & Sala et al, 2021 | Besson et al, 2020 | Chew et al, 2022 | Dounavi et al, 2019 | Holmes et al, 2018 | Houser et al, 2019 | Huang et al, 2018 | Islam et al, 2020 | Jahangiry et al, 2021 | Lahtio et al, 2022 | Lau et al, 2020 | LeBlanc et al, 2018 * | Lee et al, 2022 | Mamalaki et al, 2022 | Mata-González et al, 2020 | Novaes et al, 2022 | O'Boyle et al, 2022 | Podina et al, 2018 | Puigdomènech et al, 2019 | Rumbo-Rodríguez et al, 2020 | Shi et al, 2022 | Varela et al, 2021 |
|------------------------------|-----------------|--------------------|-----------------------|-----------------------------|--------------------------|--------------------|------------------|---------------------|--------------------|--------------------|-------------------|-------------------|-----------------------|--------------------|-----------------|-----------------------|-----------------|----------------------|---------------------------|--------------------|---------------------|--------------------|--------------------------|-----------------------------|-----------------|--------------------|
| Muralidharan (2019)          | x               |                    |                       |                             |                          |                    |                  |                     |                    |                    |                   |                   |                       |                    |                 |                       |                 |                      |                           |                    |                     |                    |                          |                             |                 |                    |
| Naimark (2015)               |                 |                    |                       |                             |                          |                    |                  |                     |                    |                    |                   |                   |                       |                    | x               |                       |                 |                      |                           |                    |                     |                    | x                        |                             |                 |                    |
| Nakata (2019)                |                 |                    |                       |                             |                          |                    |                  |                     |                    |                    |                   |                   |                       |                    |                 |                       |                 | x                    |                           |                    |                     |                    |                          |                             |                 |                    |
| Naparstek (2017)             |                 |                    |                       |                             |                          |                    |                  |                     |                    |                    |                   |                   |                       |                    |                 |                       |                 |                      |                           |                    |                     |                    |                          |                             | x               |                    |
| Napolitano (2013)            |                 |                    |                       |                             |                          | x                  |                  |                     |                    |                    |                   |                   |                       |                    |                 |                       |                 |                      |                           |                    | x                   |                    |                          | x                           | x               |                    |
| Naslund & Aschbrenner (2016) |                 |                    |                       |                             |                          |                    |                  |                     |                    |                    |                   |                   |                       |                    |                 |                       |                 |                      |                           | x                  |                     |                    |                          |                             |                 |                    |
| Naslund & Aschbrenner (2018) |                 |                    |                       |                             |                          |                    |                  |                     |                    |                    |                   |                   |                       |                    |                 |                       |                 |                      |                           | x                  |                     |                    |                          |                             |                 |                    |
| Newton (2018)                |                 |                    |                       |                             |                          |                    |                  |                     |                    |                    |                   |                   |                       |                    |                 |                       |                 |                      |                           |                    |                     |                    |                          | x                           |                 |                    |
| Nicklas (2014)               |                 |                    |                       |                             |                          |                    |                  |                     |                    |                    |                   |                   |                       |                    |                 | x                     |                 |                      |                           |                    |                     |                    |                          |                             |                 |                    |
| Niet (2012)                  |                 |                    |                       |                             |                          |                    |                  |                     | x                  |                    |                   |                   |                       |                    |                 |                       |                 |                      |                           |                    |                     |                    |                          |                             |                 |                    |
| Nikolaou (2015)              |                 |                    |                       |                             |                          |                    |                  |                     |                    |                    |                   |                   |                       |                    | x               |                       |                 |                      |                           |                    |                     |                    |                          |                             |                 |                    |
| Nollen (2014)                |                 |                    |                       |                             |                          |                    |                  |                     |                    |                    |                   |                   |                       |                    |                 |                       |                 |                      |                           |                    |                     |                    | x                        |                             |                 |                    |
| O'Brien (2014)               |                 |                    |                       |                             |                          |                    |                  |                     |                    |                    |                   |                   |                       |                    |                 |                       |                 |                      |                           |                    |                     | x                  |                          |                             |                 | x                  |
| Oh & Cho (2015)              | x               |                    |                       |                             |                          |                    |                  |                     |                    |                    |                   |                   |                       |                    |                 |                       |                 |                      |                           |                    |                     |                    | x                        |                             | x               |                    |
| Oh & Kim (2003)              |                 |                    |                       |                             |                          |                    |                  |                     |                    | x                  |                   |                   |                       |                    |                 |                       |                 |                      |                           |                    |                     |                    |                          |                             |                 |                    |
| Olson (2016)                 |                 |                    |                       |                             |                          |                    |                  |                     |                    |                    |                   |                   |                       |                    |                 |                       |                 |                      |                           |                    |                     |                    |                          |                             | x               |                    |
| Orsama (2013)                |                 |                    |                       |                             |                          |                    |                  | x                   |                    |                    |                   |                   |                       |                    |                 |                       |                 |                      |                           |                    |                     |                    |                          |                             |                 |                    |
| Ozaki (2018)                 |                 |                    |                       |                             |                          |                    |                  |                     |                    |                    |                   |                   |                       |                    |                 |                       | x               |                      |                           |                    |                     |                    |                          |                             |                 |                    |
| Ozaki (2019)                 |                 |                    |                       |                             |                          |                    |                  |                     |                    |                    |                   |                   |                       |                    |                 |                       |                 |                      |                           |                    |                     |                    |                          |                             | x               |                    |
| Pacanowski (2015)            |                 |                    |                       |                             |                          |                    |                  |                     |                    |                    |                   |                   |                       |                    |                 | x                     |                 |                      |                           |                    |                     |                    |                          |                             |                 |                    |
| Padwal (2017)                |                 |                    | x                     |                             |                          |                    |                  |                     |                    |                    |                   |                   |                       |                    |                 |                       |                 |                      |                           |                    |                     |                    |                          |                             |                 |                    |
| Park (2012)                  |                 |                    |                       |                             |                          |                    |                  | x                   |                    |                    |                   |                   | x                     |                    |                 |                       |                 |                      |                           |                    |                     |                    |                          |                             |                 |                    |

| Author(s), publication year | Ang et al, 2021 | Antoun et al, 2022 | Beleigoli et al, 2019 | Berry & Kasavou et al, 2021 | Berry & Sala et al, 2021 | Besson et al, 2020 | Chew et al, 2022 | Dounavi et al, 2019 | Holmes et al, 2018 | Houser et al, 2019 | Huang et al, 2018 | Islam et al, 2020 | Jahangiry et al, 2021 | Lahtio et al, 2022 | Lau et al, 2020 | LeBlanc et al, 2018 * | Lee et al, 2022 | Mamalaki et al, 2022 | Mata-González et al, 2020 | Novaes et al, 2022 | O'Boyle et al, 2022 | Podina et al, 2018 | Puigdomènech et al, 2019 | Rumbo-Rodríguez et al, 2020 | Shi et al, 2022 | Varela et al, 2021 |
|-----------------------------|-----------------|--------------------|-----------------------|-----------------------------|--------------------------|--------------------|------------------|---------------------|--------------------|--------------------|-------------------|-------------------|-----------------------|--------------------|-----------------|-----------------------|-----------------|----------------------|---------------------------|--------------------|---------------------|--------------------|--------------------------|-----------------------------|-----------------|--------------------|
| Partridge (2015)            |                 |                    |                       |                             |                          |                    | x                |                     |                    |                    |                   | x                 |                       |                    |                 |                       |                 |                      |                           |                    |                     |                    | x                        |                             |                 |                    |
| Partridge (2016)            |                 |                    |                       |                             |                          |                    |                  |                     |                    |                    |                   |                   |                       |                    |                 |                       |                 |                      |                           |                    |                     |                    | x**                      |                             |                 |                    |
| Patel (2019)                |                 |                    |                       |                             |                          |                    | x                |                     |                    |                    |                   | x                 |                       |                    |                 |                       |                 |                      |                           |                    |                     |                    |                          |                             |                 |                    |
| Patrick & Calfas (2011)     |                 |                    |                       |                             |                          |                    |                  |                     |                    |                    |                   |                   |                       |                    |                 | x                     |                 |                      |                           |                    |                     | x                  |                          |                             | x               |                    |
| Patrick & Raab (2009)       |                 |                    |                       |                             | x                        |                    |                  |                     |                    |                    |                   |                   |                       |                    |                 |                       |                 |                      |                           |                    |                     | x                  |                          | x                           |                 |                    |
| Pellegrini (2012)           |                 |                    | x                     |                             |                          |                    |                  |                     |                    |                    |                   |                   | x                     |                    |                 |                       |                 |                      |                           |                    |                     | x                  |                          | x                           |                 |                    |
| Perri (2008)                |                 |                    |                       |                             |                          |                    |                  |                     |                    | x                  |                   |                   |                       |                    |                 |                       |                 |                      |                           |                    |                     |                    |                          |                             |                 |                    |
| Petersen (2008)             |                 |                    |                       |                             |                          |                    |                  |                     |                    |                    |                   |                   |                       |                    |                 |                       | x               |                      |                           |                    |                     |                    |                          |                             |                 |                    |
| Pfaeffli (2015)             |                 |                    |                       |                             |                          |                    |                  | x                   |                    |                    |                   |                   |                       |                    |                 |                       |                 |                      |                           |                    |                     |                    |                          |                             |                 |                    |
| Phelan (2017)               |                 |                    |                       |                             |                          |                    |                  |                     |                    |                    |                   |                   |                       |                    |                 | x                     |                 |                      |                           |                    |                     |                    |                          |                             | x               |                    |
| Polzien (2007)              |                 |                    |                       | x                           |                          |                    |                  |                     |                    |                    |                   |                   |                       |                    |                 |                       |                 |                      |                           |                    |                     |                    |                          |                             |                 |                    |
| Pressler (2010)             |                 |                    |                       |                             |                          |                    |                  |                     |                    |                    |                   |                   |                       |                    |                 |                       | x               |                      |                           |                    |                     |                    |                          |                             |                 |                    |
| Pressman (2014)             |                 |                    |                       |                             |                          |                    |                  |                     |                    |                    | x                 |                   |                       |                    |                 |                       |                 |                      |                           |                    |                     |                    |                          |                             |                 |                    |
| Pretlow (2015)              |                 |                    |                       |                             |                          |                    |                  |                     |                    |                    |                   |                   |                       |                    |                 |                       |                 |                      |                           |                    |                     |                    | x                        |                             |                 |                    |
| Pronk (2011)                |                 |                    |                       |                             |                          |                    |                  |                     |                    | x                  |                   |                   |                       |                    |                 |                       |                 |                      |                           |                    |                     |                    |                          |                             |                 |                    |
| Purzanjani (2016)           |                 |                    |                       |                             |                          |                    |                  | x                   |                    |                    |                   |                   |                       |                    |                 |                       |                 |                      |                           |                    |                     |                    |                          |                             |                 |                    |
| Quintiliani (2016)          |                 |                    |                       |                             |                          |                    |                  |                     |                    |                    |                   |                   |                       |                    |                 |                       |                 |                      |                           |                    |                     |                    | x                        |                             |                 |                    |
| Reeves (2017)               |                 |                    |                       |                             |                          |                    |                  |                     |                    |                    |                   |                   |                       | x                  |                 |                       |                 |                      |                           |                    |                     |                    |                          |                             |                 |                    |
| Richardson (2016)           |                 |                    |                       |                             |                          |                    |                  |                     |                    |                    |                   |                   |                       |                    |                 |                       |                 |                      |                           |                    |                     |                    |                          |                             | x               |                    |
| Rimmer (2013)               |                 |                    |                       |                             |                          |                    |                  |                     |                    |                    | x                 |                   |                       | x                  |                 |                       |                 |                      |                           |                    |                     |                    |                          |                             |                 |                    |
| Risica (2013)               |                 |                    |                       |                             |                          |                    |                  |                     |                    |                    | x                 |                   |                       |                    |                 |                       |                 |                      |                           |                    |                     |                    |                          |                             |                 |                    |
| Robinson (2013)             |                 |                    |                       |                             |                          |                    |                  | x                   |                    |                    |                   |                   |                       |                    |                 |                       |                 |                      |                           |                    |                     |                    |                          |                             |                 |                    |

| Author(s), publication year | Ang et al, 2021 | Antoun et al, 2022 | Beleigoli et al, 2019 | Berry & Kasavou et al, 2021 | Berry & Sala et al, 2021 | Besson et al, 2020 | Chew et al, 2022 | Dounavi et al, 2019 | Holmes et al, 2018 | Houser et al, 2019 | Huang et al, 2018 | Islam et al, 2020 | Jahangiry et al, 2021 | Lahtio et al, 2022 | Lau et al, 2020 | LeBlanc et al, 2018 * | Lee et al, 2022 | Mamalaki et al, 2022 | Mata-González et al, 2020 | Novaes et al, 2022 | O'Boyle et al, 2022 | Podina et al, 2018 | Puigdomènech et al, 2019 | Rumbo-Rodríguez et al, 2020 | Shi et al, 2022 | Varela et al, 2021 |
|-----------------------------|-----------------|--------------------|-----------------------|-----------------------------|--------------------------|--------------------|------------------|---------------------|--------------------|--------------------|-------------------|-------------------|-----------------------|--------------------|-----------------|-----------------------|-----------------|----------------------|---------------------------|--------------------|---------------------|--------------------|--------------------------|-----------------------------|-----------------|--------------------|
| Rogers (2016)               |                 | x                  |                       |                             |                          |                    |                  |                     |                    |                    |                   |                   |                       | x                  |                 |                       |                 |                      |                           |                    |                     |                    |                          | x                           |                 |                    |
| Rosas (2020)                |                 |                    |                       |                             |                          |                    | x                |                     |                    |                    |                   |                   |                       |                    |                 |                       |                 |                      |                           |                    |                     |                    |                          |                             |                 |                    |
| Ross (2016)                 |                 | x                  |                       |                             |                          |                    | x                |                     |                    |                    |                   |                   |                       |                    |                 |                       |                 |                      |                           |                    |                     |                    |                          | x                           |                 |                    |
| Rothert (2006)              |                 |                    |                       |                             |                          |                    |                  |                     |                    |                    |                   |                   |                       |                    |                 |                       |                 |                      |                           |                    |                     | x                  |                          |                             | x               |                    |
| Sakane (2013)               |                 |                    |                       |                             |                          |                    |                  |                     |                    |                    |                   |                   |                       | x                  |                 | x                     |                 |                      |                           |                    |                     |                    |                          |                             |                 |                    |
| Schroder (2010)             |                 |                    |                       |                             |                          |                    |                  |                     |                    |                    |                   |                   |                       |                    |                 |                       |                 |                      |                           |                    |                     | x                  |                          |                             |                 |                    |
| Shapiro (2012)              |                 |                    |                       |                             | x                        |                    |                  |                     | x                  |                    |                   |                   |                       |                    | x               |                       |                 |                      |                           | x                  |                     | x                  |                          | x                           |                 |                    |
| Shaw (2013)                 |                 |                    |                       |                             | x                        |                    |                  |                     |                    |                    |                   |                   |                       |                    |                 |                       |                 |                      |                           |                    | x                   |                    |                          |                             |                 |                    |
| Sherifali (2014)            |                 |                    |                       |                             |                          |                    |                  |                     |                    |                    |                   |                   |                       |                    |                 |                       |                 |                      | x                         |                    |                     |                    |                          |                             |                 |                    |
| Sherwood & Jeffery (2006)   |                 |                    |                       |                             |                          |                    |                  |                     |                    |                    |                   |                   |                       |                    |                 |                       |                 |                      |                           |                    |                     | x                  |                          |                             |                 |                    |
| Sherwood & Jeffery (2010)   |                 |                    |                       |                             |                          |                    |                  |                     | x                  |                    |                   |                   |                       |                    |                 |                       |                 |                      |                           |                    |                     | x                  |                          |                             |                 |                    |
| Shigaki (2014)              |                 |                    |                       |                             |                          |                    |                  | x                   |                    |                    |                   |                   |                       |                    |                 |                       |                 |                      |                           |                    |                     |                    |                          |                             |                 |                    |
| Shin (2017)                 | x               | x                  |                       |                             | x                        |                    |                  |                     |                    |                    |                   |                   |                       |                    |                 |                       |                 |                      |                           |                    |                     | x                  |                          |                             |                 |                    |
| Shuger (2011)               |                 |                    |                       |                             |                          |                    |                  |                     |                    |                    |                   |                   | x                     | x                  |                 |                       |                 |                      |                           |                    |                     |                    |                          | x                           |                 |                    |
| Simpson (2017)              |                 |                    |                       |                             |                          |                    |                  | x                   |                    |                    |                   |                   |                       |                    |                 |                       |                 |                      |                           |                    |                     |                    |                          |                             |                 |                    |
| Smith (2014)                |                 |                    |                       |                             |                          |                    |                  |                     |                    |                    |                   | x                 |                       |                    |                 |                       |                 |                      |                           |                    |                     |                    |                          |                             |                 |                    |
| Sniehotta (2019)            |                 |                    |                       |                             |                          |                    |                  |                     |                    |                    |                   |                   |                       |                    |                 |                       |                 |                      | x                         |                    |                     |                    |                          |                             |                 |                    |
| Spook (2015)                |                 |                    |                       |                             |                          |                    |                  |                     |                    |                    |                   |                   |                       |                    |                 |                       |                 |                      |                           |                    |                     |                    | x                        |                             |                 |                    |
| Spring & Duncan (2013)      |                 |                    |                       |                             |                          |                    |                  |                     | x                  |                    |                   |                   |                       |                    |                 |                       |                 |                      |                           |                    |                     |                    |                          | x                           | x               |                    |
| Spring & Pellegrini (2017)  |                 | x                  |                       |                             | x                        |                    | x                |                     |                    |                    |                   |                   |                       |                    |                 |                       |                 |                      |                           |                    |                     | x                  |                          | x                           | x               |                    |
| Spring & Schneider (2012)   |                 |                    |                       |                             |                          |                    |                  | x                   |                    |                    |                   |                   |                       |                    |                 |                       |                 |                      |                           |                    |                     |                    |                          |                             |                 |                    |
| Steinberg (2013)            |                 |                    | x                     |                             |                          |                    |                  |                     |                    | x                  |                   |                   |                       |                    | x               |                       |                 |                      |                           |                    |                     |                    |                          | x                           |                 |                    |

| Author(s), publication year | Ang et al, 2021 | Antoun et al, 2022 | Beleigoli et al, 2019 | Berry & Kasavou et al, 2021 | Berry & Sala et al, 2021 | Besson et al, 2020 | Chew et al, 2022 | Dounavi et al, 2019 | Holmes et al, 2018 | Houser et al, 2019 | Huang et al, 2018 | Islam et al, 2020 | Jahangiry et al, 2021 | Lahtio et al, 2022 | Lau et al, 2020 | LeBlanc et al, 2018 * | Lee et al, 2022 | Mamalaki et al, 2022 | Mata-González et al, 2020 | Novaes et al, 2022 | O'Boyle et al, 2022 | Podina et al, 2018 | Puigdomènech et al, 2019 | Rumbo-Rodríguez et al, 2020 | Shi et al, 2022 | Varela et al, 2021 |
|-----------------------------|-----------------|--------------------|-----------------------|-----------------------------|--------------------------|--------------------|------------------|---------------------|--------------------|--------------------|-------------------|-------------------|-----------------------|--------------------|-----------------|-----------------------|-----------------|----------------------|---------------------------|--------------------|---------------------|--------------------|--------------------------|-----------------------------|-----------------|--------------------|
| Stephens (2017)             |                 | x                  |                       | x                           |                          |                    |                  |                     |                    | x                  |                   |                   |                       | x                  |                 |                       |                 |                      |                           |                    |                     | x                  |                          | x                           |                 |                    |
| Stuart (2012)               |                 |                    |                       |                             |                          |                    |                  |                     |                    |                    |                   |                   |                       | x                  |                 |                       |                 |                      |                           |                    |                     |                    |                          |                             |                 |                    |
| Suen 2019                   | x               |                    |                       |                             |                          |                    |                  |                     |                    |                    |                   |                   |                       |                    |                 |                       |                 |                      |                           |                    |                     |                    |                          |                             |                 |                    |
| Sullivan (2013)             |                 |                    |                       |                             |                          |                    |                  |                     |                    |                    |                   |                   |                       |                    |                 |                       |                 |                      |                           |                    |                     |                    |                          | x                           |                 |                    |
| Sun (2016)                  |                 |                    |                       |                             |                          |                    |                  | x                   |                    |                    |                   |                   |                       |                    |                 |                       |                 |                      |                           |                    |                     |                    |                          |                             |                 |                    |
| Svetkey & Batch (2015)      |                 | x                  |                       |                             | x                        | x                  | x                |                     |                    | x                  |                   |                   |                       |                    |                 | x                     |                 |                      |                           | x                  | x                   | x                  | x                        |                             |                 |                    |
| Svetkey & Stevens (2008)    |                 |                    |                       |                             |                          |                    |                  |                     | x                  |                    |                   |                   |                       |                    |                 | x                     |                 | x                    |                           |                    |                     |                    |                          |                             |                 |                    |
| Tanaka (2018)               | x               | x                  |                       |                             |                          |                    | x                |                     |                    |                    |                   |                   |                       |                    |                 |                       |                 |                      |                           |                    |                     |                    |                          |                             | x               |                    |
| Tang (2015)                 |                 |                    |                       |                             |                          |                    |                  | x                   |                    |                    |                   |                   |                       |                    |                 |                       |                 |                      |                           |                    |                     |                    |                          |                             |                 |                    |
| Tate & Jackvony (2003)      |                 |                    |                       |                             |                          |                    |                  |                     |                    |                    |                   |                   |                       |                    | x               |                       |                 |                      |                           |                    |                     |                    |                          |                             | x               |                    |
| Tate & Jackvony (2006)      |                 |                    |                       |                             | x                        |                    |                  |                     |                    |                    |                   |                   |                       |                    | x               |                       |                 |                      |                           |                    |                     |                    |                          |                             |                 |                    |
| Tate & Wing (2001)          |                 |                    |                       |                             |                          |                    |                  |                     |                    |                    |                   |                   |                       |                    | x               |                       |                 | x                    |                           |                    |                     | x                  |                          |                             |                 | x                  |
| Teeriniemi (2018)           |                 |                    |                       |                             |                          |                    |                  |                     |                    |                    |                   |                   |                       |                    |                 |                       |                 |                      |                           |                    |                     |                    |                          |                             | x               |                    |
| Temmingh (2013)             |                 |                    |                       |                             |                          |                    |                  |                     |                    |                    |                   |                   |                       |                    |                 |                       |                 |                      | x                         |                    |                     |                    |                          |                             |                 |                    |
| Thomas & Bond (2019)        |                 | x                  |                       |                             |                          |                    |                  |                     |                    |                    |                   |                   |                       |                    |                 |                       |                 |                      |                           |                    |                     |                    |                          | x                           | x               |                    |
| Thomas & Leahey (2015)      |                 |                    |                       |                             |                          |                    |                  |                     |                    | x                  |                   |                   |                       |                    |                 |                       |                 |                      |                           |                    |                     | x                  |                          |                             |                 |                    |
| Thomas & Raynor (2017)      |                 |                    |                       |                             |                          |                    |                  |                     |                    |                    |                   |                   |                       |                    |                 | x                     |                 |                      |                           |                    |                     |                    |                          |                             |                 | x                  |
| Thomas & Vydellingum (2011) |                 |                    |                       |                             |                          |                    |                  |                     | x                  |                    |                   |                   |                       |                    |                 |                       |                 | x                    |                           |                    |                     |                    |                          |                             |                 |                    |
| Thomas & Wing (2013)        |                 |                    |                       |                             |                          |                    |                  | x                   |                    | x                  |                   |                   |                       |                    |                 |                       |                 |                      |                           |                    |                     |                    | x                        |                             |                 |                    |
| Thompson-Felty (2017)       |                 | x                  |                       |                             |                          |                    |                  |                     |                    |                    |                   |                   |                       |                    |                 |                       |                 |                      |                           |                    |                     |                    |                          |                             |                 |                    |
| Thorndike (2012)            |                 |                    |                       |                             |                          |                    |                  |                     |                    |                    |                   |                   |                       |                    |                 |                       |                 |                      | x                         |                    |                     |                    |                          |                             |                 |                    |
| Turk (2013)                 |                 |                    |                       |                             |                          |                    |                  | x                   |                    |                    |                   |                   |                       |                    |                 |                       |                 |                      |                           |                    |                     |                    |                          |                             |                 |                    |

| Author(s), publication year     | Ang et al, 2021 | Antoun et al, 2022 | Beleigoli et al, 2019 | Berry & Kasavou et al, 2021 | Berry & Sala et al, 2021 | Besson et al, 2020 | Chew et al, 2022 | Dounavi et al, 2019 | Holmes et al, 2018 | Houser et al, 2019 | Huang et al, 2018 | Islam et al, 2020 | Jahangiry et al, 2021 | Lahtio et al, 2022 | Lau et al, 2020 | LeBlanc et al, 2018 * | Lee et al, 2022 | Mamalaki et al, 2022 | Mata-González et al, 2020 | Novaes et al, 2022 | O'Boyle et al, 2022 | Podina et al, 2018 | Puigdomènech et al, 2019 | Rumbo-Rodríguez et al, 2020 | Shi et al, 2022 | Varela et al, 2021 |
|---------------------------------|-----------------|--------------------|-----------------------|-----------------------------|--------------------------|--------------------|------------------|---------------------|--------------------|--------------------|-------------------|-------------------|-----------------------|--------------------|-----------------|-----------------------|-----------------|----------------------|---------------------------|--------------------|---------------------|--------------------|--------------------------|-----------------------------|-----------------|--------------------|
| Turner-McGrievy & Beets (2013)  |                 |                    |                       |                             |                          |                    | x                |                     |                    | x                  |                   |                   |                       |                    |                 |                       |                 |                      |                           |                    |                     |                    |                          |                             | x               |                    |
| Turner-McGrievy & Tate (2011)   |                 | x                  |                       |                             | x                        |                    |                  |                     |                    |                    |                   |                   |                       |                    |                 |                       |                 |                      |                           |                    |                     |                    |                          | x                           |                 |                    |
| Turner-McGrievy & Wilcox (2017) |                 | x                  |                       |                             |                          | x                  |                  |                     |                    |                    |                   |                   |                       |                    |                 |                       |                 |                      |                           |                    |                     |                    |                          |                             |                 |                    |
| Unick (2012)                    |                 |                    |                       |                             |                          |                    |                  |                     |                    |                    |                   |                   |                       |                    |                 |                       |                 |                      |                           |                    |                     |                    |                          | x                           |                 |                    |
| van Dyck (2013)                 |                 |                    |                       |                             |                          |                    |                  |                     |                    |                    | x                 |                   |                       |                    |                 |                       |                 |                      |                           |                    |                     |                    |                          |                             |                 |                    |
| van Wier & Ariëns (2009)        |                 |                    |                       |                             |                          |                    |                  |                     |                    |                    |                   |                   |                       | x                  |                 |                       |                 |                      |                           |                    |                     |                    |                          |                             |                 |                    |
| van Wier & Dekkers (2011)       |                 |                    |                       |                             |                          |                    |                  |                     |                    |                    |                   |                   |                       |                    | x               | x                     |                 |                      |                           |                    |                     |                    |                          |                             |                 |                    |
| van Wier & Dekkers (2012)       |                 |                    |                       |                             |                          |                    |                  |                     |                    |                    |                   |                   |                       |                    |                 |                       |                 |                      |                           |                    |                     |                    |                          |                             | x               |                    |
| Vaz (2018)                      |                 | x                  |                       |                             |                          |                    |                  |                     |                    |                    |                   |                   |                       |                    |                 |                       |                 |                      |                           |                    |                     |                    |                          |                             |                 |                    |
| Wang (2012)                     |                 |                    |                       |                             |                          |                    |                  |                     |                    |                    |                   |                   |                       |                    |                 |                       |                 |                      |                           |                    |                     |                    |                          | x                           |                 |                    |
| Watson & Bickmore (2012)        |                 |                    |                       |                             |                          |                    |                  |                     |                    | x                  |                   |                   |                       |                    |                 |                       |                 |                      |                           |                    |                     |                    |                          |                             |                 |                    |
| Watson & Woodside (2015)        |                 |                    |                       | x                           |                          |                    |                  |                     |                    |                    |                   |                   |                       | x                  |                 |                       |                 |                      |                           |                    |                     |                    |                          |                             | x               |                    |
| Wayne (2014)                    |                 |                    |                       |                             |                          |                    | x                |                     |                    |                    |                   |                   |                       |                    |                 |                       |                 |                      |                           |                    |                     |                    |                          |                             |                 |                    |
| Webber (2008)                   |                 |                    |                       |                             |                          |                    |                  |                     |                    |                    |                   |                   |                       |                    |                 |                       |                 |                      |                           |                    |                     |                    |                          |                             | x               |                    |
| Werkman (2010)                  |                 |                    |                       |                             |                          |                    |                  |                     |                    |                    |                   |                   |                       |                    |                 |                       |                 |                      |                           |                    |                     |                    |                          |                             | x               |                    |
| West (2016)                     |                 |                    |                       |                             |                          |                    |                  |                     |                    |                    |                   |                   |                       |                    |                 |                       |                 |                      |                           | x                  |                     |                    |                          |                             | x               |                    |
| Wharton (2014)                  |                 |                    |                       |                             |                          |                    |                  |                     |                    |                    |                   |                   |                       |                    |                 |                       |                 |                      |                           |                    |                     |                    |                          | x                           |                 |                    |
| Whitelock (2019)                |                 | x                  |                       |                             |                          |                    |                  |                     |                    |                    |                   |                   |                       |                    |                 |                       |                 |                      |                           |                    |                     |                    |                          |                             |                 |                    |
| Willey (2016)                   |                 |                    |                       |                             |                          |                    |                  |                     |                    |                    |                   |                   |                       |                    |                 |                       |                 |                      |                           |                    |                     |                    | x                        |                             |                 |                    |
| Williams (2019)                 |                 |                    |                       |                             |                          |                    |                  |                     |                    |                    |                   |                   |                       |                    |                 |                       |                 |                      |                           | x                  |                     |                    |                          |                             |                 |                    |
| Williamson (2006)               |                 |                    |                       |                             |                          |                    |                  |                     |                    |                    | x                 |                   |                       |                    |                 |                       |                 |                      |                           |                    |                     |                    |                          |                             |                 |                    |
| Wing (2006)                     |                 |                    |                       |                             |                          |                    |                  | x                   |                    |                    |                   |                   |                       |                    |                 | x                     |                 | x                    |                           |                    |                     |                    |                          |                             |                 |                    |



| Author(s), publication year | Ang et al, 2021 | Antoun et al, 2022 | Beleigoli et al, 2019 | Berry & Kasavou et al, 2021 | Berry & Sala et al, 2021 | Besson et al, 2020 | Chew et al, 2022 | Dounavi et al, 2019 | Holmes et al, 2018 | Houser et al, 2019 | Huang et al, 2018 | Islam et al, 2020 | Jahangiry et al, 2021 | Lahtio et al, 2022 | Lau et al, 2020 | LeBlanc et al, 2018 * | Lee et al, 2022 | Mamalaki et al, 2022 | Mata-González et al, 2020 | Novaes et al, 2022 | O'Boyle et al, 2022 | Podina et al, 2018 | Puigdomènech et al, 2019 | Rumbo-Rodríguez et al, 2020 | Shi et al, 2022 | Varela et al, 2021 |  |
|-----------------------------|-----------------|--------------------|-----------------------|-----------------------------|--------------------------|--------------------|------------------|---------------------|--------------------|--------------------|-------------------|-------------------|-----------------------|--------------------|-----------------|-----------------------|-----------------|----------------------|---------------------------|--------------------|---------------------|--------------------|--------------------------|-----------------------------|-----------------|--------------------|--|
| Womble (2004)               |                 |                    |                       |                             |                          | x                  |                  |                     |                    |                    |                   |                   |                       |                    |                 |                       |                 |                      |                           |                    |                     |                    |                          |                             | x               | x                  |  |
| Wong (2005)                 |                 |                    |                       |                             |                          |                    |                  |                     |                    |                    | x                 |                   |                       |                    |                 |                       |                 |                      |                           |                    |                     |                    |                          |                             |                 |                    |  |
| Wylie-Rosett (2001)         |                 |                    |                       |                             |                          |                    |                  |                     |                    |                    |                   |                   |                       |                    |                 | x                     |                 |                      |                           |                    |                     |                    |                          |                             | x               |                    |  |
| Yang & Lee (2020)           | x               |                    |                       |                             |                          |                    |                  |                     |                    |                    |                   |                   |                       |                    |                 |                       |                 |                      |                           |                    |                     |                    |                          |                             |                 |                    |  |
| Yang & Wang (2017)          | x               |                    |                       |                             |                          |                    |                  |                     |                    |                    |                   |                   |                       |                    |                 |                       |                 |                      |                           |                    |                     |                    |                          |                             |                 |                    |  |
| Yardley (2014)              |                 |                    | x                     |                             |                          |                    |                  |                     |                    |                    |                   |                   |                       |                    |                 |                       |                 |                      | x                         |                    | x                   | x                  |                          |                             |                 |                    |  |
| Yoo (2009)                  |                 |                    |                       |                             |                          |                    |                  |                     |                    |                    | x                 |                   |                       |                    |                 |                       |                 |                      |                           |                    |                     |                    |                          |                             |                 |                    |  |
| Young & Callister (2017)    |                 |                    |                       |                             |                          |                    |                  |                     |                    |                    |                   |                   |                       |                    |                 | x                     |                 |                      |                           |                    |                     |                    |                          |                             |                 |                    |  |
| Young & Cihen (2017)        |                 |                    |                       |                             |                          |                    |                  |                     |                    |                    |                   |                   |                       |                    |                 |                       |                 |                      | x                         |                    |                     |                    |                          |                             |                 |                    |  |
| Zhang (2019)                | x               |                    |                       |                             |                          |                    |                  |                     |                    |                    |                   |                   |                       |                    |                 |                       |                 |                      |                           |                    |                     |                    |                          |                             |                 |                    |  |
| Zhou & Cheng 2016           | x               |                    |                       |                             |                          |                    |                  |                     |                    |                    |                   |                   |                       |                    |                 |                       |                 |                      |                           |                    |                     |                    |                          |                             |                 |                    |  |
| Zhou & Zhang (2021)         |                 |                    |                       |                             |                          |                    | x                |                     |                    |                    |                   |                   |                       |                    |                 |                       |                 |                      |                           |                    |                     |                    |                          |                             |                 |                    |  |
| Zwickert (2016)             |                 |                    |                       |                             |                          |                    |                  |                     |                    |                    |                   |                   |                       |                    |                 |                       |                 |                      |                           |                    |                     |                    |                          |                             |                 | x                  |  |

\* only studies incorporating technology

\*\* dual publication: same study as in Partidge 2015

**Table S3.** Funding information of the included reviews.

| Author(s), publication year  | Source of funding                                                                                                                                                                                                                                                                                                                                                                                              |
|------------------------------|----------------------------------------------------------------------------------------------------------------------------------------------------------------------------------------------------------------------------------------------------------------------------------------------------------------------------------------------------------------------------------------------------------------|
| Ang et al, 2021              | grant from the Singapore Ministry of Health's National Medical Research Council under its Health Services Research Grant program (NMRC/HSRG/0063/2016)                                                                                                                                                                                                                                                         |
| Antoun et al, 2022           | N/A                                                                                                                                                                                                                                                                                                                                                                                                            |
| Beleigoli et al, 2019        | Study was supported with grants from the National Institute of Science and Technology for Health Technology Assessment (IATS) – CNPq/Brazil. Author AMB was funded by Programa de Pós Doutorado (Prêmio Capes de Teses em Medicina I-2013) from Coordenação de Aperfeiçoamento de Pessoal de Nível Superior (Capes) and author ALR CNPq (research fellowship number 310679/2016–8) and FAPEMIG (PPM-00428-17). |
| Berry & Kassavou et al, 2021 | N/A                                                                                                                                                                                                                                                                                                                                                                                                            |
| Berry & Sala et al, 2021     | N/A                                                                                                                                                                                                                                                                                                                                                                                                            |
| Besson et al, 2020           | N/A                                                                                                                                                                                                                                                                                                                                                                                                            |
| Chew et al, 2022             | grant from the National University Health System Internal Grant Funding under NUHSRO/2021/063/RO5+6/FMPCHSRG-Mar21/01                                                                                                                                                                                                                                                                                          |
| Dounavi et al, 2019          | grant from MyHabeats                                                                                                                                                                                                                                                                                                                                                                                           |
| Holmes et al, 2018           | study supported by a Postgraduate Studentship Award from the Department of the Economy (Northern Ireland)                                                                                                                                                                                                                                                                                                      |
| Houser et al, 2019           | supported by the National Science Foundation's Center for Healthcare Organization and Transformation (CHOT) Project 10-06181                                                                                                                                                                                                                                                                                   |
| Huang et al, 2018            | no funding                                                                                                                                                                                                                                                                                                                                                                                                     |
| Islam et al, 2020            | supported by the Ministry of Education (MOE) under grant MOE 108-6604-001-400 and DP2-109-21121-01-A-01 and the Ministry of Science and Technology (MOST) under grant MOST 108-2823-8-038-002- and 109-2222-E-038-002-MY2.                                                                                                                                                                                     |
| Jahangiry et al, 2021        | study supported by grant from research undersecretary of Tabriz University of Medical sciences (Identifier: IR.TBZMED.VCR.REC.1398.003; with the grant number of 61052).                                                                                                                                                                                                                                       |
| Lahtio et al, 2022           | Study supported by the Social Insurance Institution of Finland (grant number 31/26/2014)                                                                                                                                                                                                                                                                                                                       |
| Lau et al, 2020              | N/A                                                                                                                                                                                                                                                                                                                                                                                                            |
| LeBlanc et al, 2018          | Study funded under contract HHS290201200015I, Task Order 6, from the Agency for Healthcare Research and Quality (AHRQ), US Department of Health and Human Services, under a contract to support the USPSTF.                                                                                                                                                                                                    |
| Lee et al, 2022              | Stuy supported by the Seoul National University Hospital.                                                                                                                                                                                                                                                                                                                                                      |
| Mamalaki et al, 2022         | Supported by the European Union's Horizon 2020 Research and Innovation Programme through NUTRISHIELD project ( <a href="https://nutrishield-project.eu/">https://nutrishield-project.eu/</a> ) under Grant Agreement No. 818110.                                                                                                                                                                               |
| Mata-González et al, 2020    | The National Council of Science and Technology (CONACYT) supported the academic stay in Spain of the first author.                                                                                                                                                                                                                                                                                             |
| Novaes et al, 2022           | N/A                                                                                                                                                                                                                                                                                                                                                                                                            |

|                             |                                                                                                                                                                                                                                                 |
|-----------------------------|-------------------------------------------------------------------------------------------------------------------------------------------------------------------------------------------------------------------------------------------------|
| O'Boyle et al, 2022         | N/A                                                                                                                                                                                                                                             |
| Podina et al, 2018          | Supported by a grant from the Romanian National Authority for Scientific Research and Innovation, CNCS—UEFISCDI, project number PN II-RU-TE-2014-4-2481, contract number 293/01/10/ 2015, coordinated by IRP.                                   |
| Puigdomènech et al, 2019    | Fully funded by the Instituto de Salud Carlos III from the Spanish Ministry of Science, Innovation and Universities, grant number PI16/01764 co-funded by FEDER.                                                                                |
| Rumbo-Rodriguez et al, 2020 | TIN2017-89069-R funded by the Ministry of Economy, Industry and Competitiveness and the European Regional Development Fund (FEDER)                                                                                                              |
| Shi et al, 2022             | Study supported by the Practical Research Project for Life-Style related Diseases including Cardiovascular Diseases and Diabetes Mellitus from the Japan Agency for Medical Research and Development, AMED under grant number 21ek0210124h9903. |
| Varela et al, 2021          | Funding not applicable                                                                                                                                                                                                                          |

**Table S4.** Quality of the included reviews

| Author(s), publication year | 1 question follows PICO framework | 2 predefined potocol or guide | 3 RCT/NRSI inclusion justified | 4 comprehensive literature search | 5 record selection in duplicate | 6 data extraction in duplicate | 7 provides list of excluded studies | 8 describes included studies in detail | 9 comprehensive RoB assessment | 10 funding sources of studies reported | 11 used appropriate statistical methods | 12 RoB assessed in statistical analyses | 13 RoB discussed | 14 heterogeneity discussed | 15 publication bias discussed | 16 competing interests declaration | Quality of review |                                                                                                                                                                                            |
|-----------------------------|-----------------------------------|-------------------------------|--------------------------------|-----------------------------------|---------------------------------|--------------------------------|-------------------------------------|----------------------------------------|--------------------------------|----------------------------------------|-----------------------------------------|-----------------------------------------|------------------|----------------------------|-------------------------------|------------------------------------|-------------------|--------------------------------------------------------------------------------------------------------------------------------------------------------------------------------------------|
| LeBlanc et al, 2018         | Y                                 | PY                            | PY                             | N                                 | Y                               | PY                             | Y                                   | Y                                      | Y                              | N                                      | Y                                       | Y                                       | Y                | Y                          | Y                             | Y                                  | moderate          | I3: No pre-registered protocol found. Study criteria different for efficacy and risks. I4: language restriction not justified.                                                             |
| Puigdomènech et al, 2019    | Y                                 | Y                             | Y                              | N                                 | Y                               | Y                              | Y                                   | N                                      | Y                              | N                                      | -                                       | -                                       | Y                | Y                          | Y                             | Y                                  | moderate          | I4: English, Spanish, or French only, no justification. I3: did not explicitly explain including RCTs for one outcome and also NRSIs for another. I8: potential comparators not described. |
| Ang et al, 2021             | Y                                 | Y                             | N                              | N                                 | Y                               | Y                              | N                                   | Y                                      | Y                              | N                                      | Y                                       | N                                       | Y                | Y                          | Y                             | Y                                  | low               | I3: RCTs, quasi-randomized trials or non-RCTs only, no justification. I4: English only, no justification.                                                                                  |
| Antoun et al, 2022          | Y                                 | N                             | N                              | PY                                | Y                               | Y                              | Y                                   | Y                                      | Y                              | N                                      | Y                                       | N                                       | Y                | Y                          | Y                             | Y                                  | low               | I3: RCTs only, no justification.                                                                                                                                                           |
| Beleigoli et al, 2019       | Y                                 | N                             | N                              | PY                                | Y                               | Y                              | N                                   | Y                                      | Y                              | N                                      | Y                                       | Y                                       | Y                | Y                          | Y                             | Y                                  | low               | I2: Did not explicitly state that there was a pre-written comprehensive protocol or guide. I3: RCT only, no justification.                                                                 |

| Author(s), publication year  | 1 question follows PICO framework | 2 predefined protocol or guide | 3 RCT/NRSI inclusion justified | 4 comprehensive literature search | 5 record selection in duplicate | 6 data extraction in duplicate | 7 provides list of excluded studies | 8 describes included studies in detail | 9 comprehensive RoB assessment | 10 funding sources of studies reported | 11 used appropriate statistical methods | 12 RoB assessed in statistical analyses | 13 RoB discussed | 14 heterogeneity discussed | 15 publication bias discussed | 16 competing interests declaration | Quality of review |                                                                                                                                                                                    |
|------------------------------|-----------------------------------|--------------------------------|--------------------------------|-----------------------------------|---------------------------------|--------------------------------|-------------------------------------|----------------------------------------|--------------------------------|----------------------------------------|-----------------------------------------|-----------------------------------------|------------------|----------------------------|-------------------------------|------------------------------------|-------------------|------------------------------------------------------------------------------------------------------------------------------------------------------------------------------------|
| Berry & Kassavou et al, 2021 | Y                                 | Y                              | Y                              | N                                 | Y                               | Y                              | N                                   | Y                                      | Y                              | N                                      | Y                                       | Y                                       | Y                | N                          | Y                             | Y                                  | low               | I4: English only, no justification.                                                                                                                                                |
| Chew et al, 2022             | Y                                 | Y                              | N                              | N                                 | Y                               | Y                              | N                                   | Y                                      | Y                              | Y                                      | Y                                       | N                                       | Y                | Y                          | Y                             | Y                                  | low               | I4: English only, not justified. Plans to use sensitivity analyses but no mention of these in results; does subgroup analysis instead.                                             |
| Huang et al, 2018            | Y                                 | N                              | N                              | N                                 | Y                               | N                              | N                                   | Y                                      | Y                              | N                                      | Y                                       | Y                                       | Y                | Y                          | Y                             | Y                                  | low               | I2: Claims to adhere with PRISMA guidelines, no mention of pre-defined protocol or guide. I3: RCTs only, no justification. I4: English and Chinese only, no justification.         |
| Lahtio et al, 2022           | Y                                 | N                              | N                              | N                                 | N                               | ?                              | N                                   | Y                                      | Y                              | N                                      | Y                                       | Y                                       | Y                | Y                          | Y                             | Y                                  | low               | I4: Language restriction not justified. I2: Deviation from protocol not explained. Protocol states study selection to be done in duplicate, studies selected by only one reviewer. |
| Lau et al, 2020              | Y                                 | Y                              | Y                              | N                                 | Y                               | Y                              | N                                   | PY                                     | Y                              | PY                                     | Y                                       | Y                                       | Y                | Y                          | Y                             | Y                                  | low               | I4: English only, no explanation. Study descriptions lack data on trial population sizes.                                                                                          |
| Lee et al, 2022              | Y                                 | N                              | N                              | N                                 | Y                               | Y                              | N                                   | Y                                      | Y                              | N                                      | -                                       | -                                       | Y                | Y                          | Y                             | Y                                  | low               | I4: English or Korean only, not justified. Data extraction not mentioned to be in duplicate, but four reviewers assessed                                                           |

| Author(s), publication year | 1 question follows PICO framework | 2 predefined potocol or guide | 3 RCT/NRSI inclusion justified | 4 comprehensive literature search | 5 record selection in duplicate | 6 data extraction in duplicate | 7 provides list of excluded studies | 8 describes included studies in detail | 9 comprehensive RoB assessment | 10 funding sources of studies reported | 11 used appropriate statistical methods | 12 RoB assessed in statistical analyses | 13 RoB discussed | 14 heterogeneity discussed | 15 publication bias discussed | 16 competing interests declaration | Quality of review |                                                                                                                                                                                                                                                 |
|-----------------------------|-----------------------------------|-------------------------------|--------------------------------|-----------------------------------|---------------------------------|--------------------------------|-------------------------------------|----------------------------------------|--------------------------------|----------------------------------------|-----------------------------------------|-----------------------------------------|------------------|----------------------------|-------------------------------|------------------------------------|-------------------|-------------------------------------------------------------------------------------------------------------------------------------------------------------------------------------------------------------------------------------------------|
|                             |                                   |                               |                                |                                   |                                 |                                |                                     |                                        |                                |                                        |                                         |                                         |                  |                            |                               |                                    |                   | the tables and achieved consensus on their contents.                                                                                                                                                                                            |
| Mamalaki et al, 2022        | Y                                 | N                             | N                              | N                                 | Y                               | Y                              | N                                   | Y                                      | Y                              | N                                      | Y                                       | N                                       | Y                | Y                          | Y                             | Y                                  | low               | I2: registered in PROSPERO but only when review was close to being finished (i.e. no preregistered protocol). I4: English only, no justification.                                                                                               |
| Podina et al, 2018          | Y                                 | N                             | N                              | PY                                | PY                              | Y                              | N                                   | N                                      | Y                              | N                                      | Y                                       | Y                                       | Y                | Y                          | Y                             | N                                  | low               | I3: RCTs only, no justification. I5: Abstracts screened by a single reviewer, full texts by two reviewers. I8: Did not describe included interventions in adequate detail.                                                                      |
| Shi et al, 2022             | Y                                 | Y                             | N                              | N                                 | Y                               | Y                              | N                                   | N                                      | Y                              | N                                      | Y                                       | N                                       | Y                | Y                          | Y                             | Y                                  | low               | I4: English or Japanese only, no justification. Did not search reference lists. I8: Did not describe interventions or controls in detail, only those in meta-analysis. I12: Did subgroup analysis but did not assess impact of RoB in analysis. |
| Varela et al, 2021          | Y                                 | Y                             | N                              | N                                 | Y                               | Y                              | N                                   | Y                                      | Y                              | N                                      | Y                                       | Y                                       | Y                | Y                          | N                             | Y                                  | low               | I4: English and Spanish only, no justification. I2: In the protocol, the lower BMI threshold is set to 27 kg/m <sup>2</sup> , whereas in the article it is set to 25. Deviation from protocol not explained.                                    |

| Author(s), publication year | 1 question follows PICO framework | 2 predefined protocol or guide | 3 RCT/NRSI inclusion justified | 4 comprehensive literature search | 5 record selection in duplicate | 6 data extraction in duplicate | 7 provides list of excluded studies | 8 describes included studies in detail | 9 comprehensive RoB assessment | 10 funding sources of studies reported | 11 used appropriate statistical methods | 12 RoB assessed in statistical analyses | 13 RoB discussed | 14 heterogeneity discussed | 15 publication bias discussed | 16 competing interests declaration | Quality of review |                                                                                                                                                                                                                     |
|-----------------------------|-----------------------------------|--------------------------------|--------------------------------|-----------------------------------|---------------------------------|--------------------------------|-------------------------------------|----------------------------------------|--------------------------------|----------------------------------------|-----------------------------------------|-----------------------------------------|------------------|----------------------------|-------------------------------|------------------------------------|-------------------|---------------------------------------------------------------------------------------------------------------------------------------------------------------------------------------------------------------------|
| Berry & Sala et al, 2021    | Y                                 | N                              | PY                             | N                                 | N                               | Y                              | Y                                   | Y                                      | Y                              | N                                      | Y                                       | Y                                       | Y                | Y                          | Y                             | Y                                  | critically low    | I3: RCT/quasi-RCT with prepost design only, no justification. I4: English only, no justification. I5: Three investigators in total screened literature but not all records were screened by at least two reviewers. |
| Besson et al, 2020          | Y                                 | N                              | N                              | N                                 | Y                               | N                              | N                                   | Y                                      | N                              | N                                      | .                                       | .                                       | N                | Y                          | Y                             | N                                  | critically low    | I4: English only, no justification. I9 & I13: Does not assess nor discuss RoB apart from briefly mentioning publication bias in the discussion.                                                                     |
| Dounavi et al, 2019         | Y                                 | N                              | N                              | N                                 | Y                               | ?                              | N                                   | Y                                      | N                              | N                                      | .                                       | .                                       | Y                | Y                          | .                             | N                                  | critically low    | I4: English only, no justification. I9: RoB not assessed in NRSIs (17 of 39 included studies). I16: Competing interest disclosed but no description of management of such interest.                                 |
| Holmes et al, 2018          | Y                                 | N                              | N                              | N                                 | Y                               | N                              | N                                   | Y                                      | N                              | N                                      | -                                       | -                                       | N                | N                          | -                             | Y                                  | critically low    | I3: RCTs only, no justification. I4: English only, no justification. I9: RoB not assessed.                                                                                                                          |
| Houser et al, 2019          | Y                                 | N                              | N                              | N                                 | ?                               | ?                              | N                                   | N                                      | N                              | N                                      | .                                       | .                                       | Y                | Y                          | .                             | N                                  | critically low    | I4: English only, no justification. I5: Two reviewers evaluated full text studies, does not describe how the selection of records before this was conducted.                                                        |

| Author(s), publication year | 1 question follows PICO framework | 2 predefined potocol or guide | 3 RCT/NRSI inclusion justified | 4 comprehensive literature search | 5 record selection in duplicate | 6 data extraction in duplicate | 7 provides list of excluded studies | 8 describes included studies in detail | 9 comprehensive RoB assessment | 10 funding sources of studies reported | 11 used appropriate statistical methods | 12 RoB assessed in statistical analyses | 13 RoB discussed | 14 heterogeneity discussed | 15 publication bias discussed | 16 competing interests declaration | Quality of review |                                                                                                                                                                                                                                                           |
|-----------------------------|-----------------------------------|-------------------------------|--------------------------------|-----------------------------------|---------------------------------|--------------------------------|-------------------------------------|----------------------------------------|--------------------------------|----------------------------------------|-----------------------------------------|-----------------------------------------|------------------|----------------------------|-------------------------------|------------------------------------|-------------------|-----------------------------------------------------------------------------------------------------------------------------------------------------------------------------------------------------------------------------------------------------------|
| Islam et al, 2020           | Y                                 | N                             | N                              | N                                 | Y                               | ?                              | N                                   | Y                                      | Y/N                            | N                                      | Y/N                                     | Y                                       | Y                | Y                          | Y                             | Y                                  | critically low    | I4: English only, no justification. I9: NRSI was not assessed for RoB. I11: NRSI included in general meta-analysis without justification and estimates were not adjusted for confounding. Separate estimates were presented only for weight, not for BMI. |
| Jahangiry et al, 2021       | Y                                 | Y                             | N                              | N                                 | Y                               | N                              | N                                   | N                                      | N                              | N                                      | Y                                       | Y                                       | Y                | Y                          | Y                             | Y                                  | critically low    | I3: RCTs only, no explanation. I4: English only, no justification. I9: RoB assessed used the Jadad scale which is not a comprehensible RoB assessment (assesses only randomization, blinding, withdrawals, and dropouts).                                 |
| Mata-González et al, 2020   | Y                                 | N                             | Y                              | N                                 | Y                               | ?                              | N                                   | N                                      | N                              | N                                      | .                                       | .                                       | Y                | Y                          | Y                             | Y                                  | critically low    | I4: English or Spanish only, no justification. I8: did not describe RCT groups or sizes, did not describe interventions in adequate detail to form an overview of said interventions. I9: only assessed RoB of RCTs (11/21 of included studies).          |
| Novaes et al, 2022          | Y                                 | N                             | Y                              | PY                                | Y                               | Y                              | N                                   | N                                      | N                              | N                                      | .                                       | .                                       | Y                | Y                          | .                             | Y                                  | critically low    | I2: Substantial deviations from protocol not explained. Protocol states maximum age of 70, review of 65. Protocol includes                                                                                                                                |



| Author(s), publication year | 1 question follows PICO framework | 2 predefined protocol or guide | 3 RCT/NRSI inclusion justified | 4 comprehensive literature search | 5 record selection in duplicate | 6 data extraction in duplicate | 7 provides list of excluded studies | 8 describes included studies in detail | 9 comprehensive RoB assessment | 10 funding sources of studies reported | 11 used appropriate statistical methods | 12 RoB assessed in statistical analyses | 13 RoB discussed | 14 heterogeneity discussed | 15 publication bias discussed | 16 competing interests declaration | Quality of review |                                                                                                                                                                                                                                                                                                                                                                                                                                          |
|-----------------------------|-----------------------------------|--------------------------------|--------------------------------|-----------------------------------|---------------------------------|--------------------------------|-------------------------------------|----------------------------------------|--------------------------------|----------------------------------------|-----------------------------------------|-----------------------------------------|------------------|----------------------------|-------------------------------|------------------------------------|-------------------|------------------------------------------------------------------------------------------------------------------------------------------------------------------------------------------------------------------------------------------------------------------------------------------------------------------------------------------------------------------------------------------------------------------------------------------|
|                             |                                   |                                |                                |                                   |                                 |                                |                                     |                                        |                                |                                        |                                         |                                         |                  |                            |                               |                                    |                   | risk of bias and certainty of evidence assessments; these are not conducted. Data extracted deviates from protocol (e.g. does not describe phase of bipolar disorders, retention rates, intervention types, or description of interventions).                                                                                                                                                                                            |
| O'Boyle et al, 2022         | Y                                 | PY                             | N                              | N                                 | N                               | N*                             | N                                   | Y                                      | N                              | N                                      | .                                       | .                                       | Y                | Y                          | .                             | Y                                  | critically low    | I4: English only, no justification. I9: RoB assessed using the Academy of Nutrition and Dietetics Quality Criteria Checklist, which does not assess for randomization                                                                                                                                                                                                                                                                    |
| Rumbo-Rodriguez et al, 2020 | Y                                 | N                              | N                              | N                                 | Y                               | N                              | N                                   | N                                      | N                              | N                                      | -                                       | -                                       | N                | Y                          | -                             | Y                                  | critically low    | I2: included both NRSIs and RCTs but does not justify this. I4: English and Spanish only, no justification. I6: RoB assessed in duplicate, data extraction otherwise carried out by only one reviewer. I8: Population (e.g. weight demographics) and controls (e.g. control interventions) not described in detail. I9: Assessment of RoB included in Methods, however no reports of RoB is included in the Results nor is it discussed. |

RCT = Randomized Controlled Trial. NRSI = Non-Randomized Study of Intervention. RoB = Risk of Bias. Y = yes. PY = partial yes. N = no. I = item.

Quality of the included reviews was assessed using the AMSTAR-2 tool [1]. Each of the 16 items reflect potential weaknesses in quality. Items 11, 12 and 15 only apply to reviews with meta-analysis. In this study, items 2, 4, 9, 11, 13, and 15 are considered critical domains. Reviews of high quality must have no or only one non-critical weakness. Reviews of moderate quality may have more than one non-critical weakness, but multiple non-critical weaknesses may lower the appraisal to low quality. Reviews of low quality have one critical flaw with or without non-critical weaknesses. Reviews of critically low quality have more than one critical flaw with or without non-critical weaknesses.

[1] Shea BJ, Reeves BC, Wells G, Thuku M, Hamel C, Moran J, et al. AMSTAR 2: a critical appraisal tool for systematic reviews that include randomised or non-randomised studies of healthcare interventions, or both. *BMJ*. 2017;358:j4008.
